# Supplementary material for: CHARGE and Kabuki Syndromes: Gene-Specific DNA Methylation Signatures Identify Epigenetic Mechanisms Linking These Clinically Overlapping Conditions
Source: PubMed Central journal article supplement — Am J Hum Genet. 2017 May 4;100(5):773–88. doi: 10.1016/j.ajhg.2017.04.004 (PMC5420353; doi:10.1016/j.ajhg.2017.04.004), 2017-05-04
Supplement: mmc1.pdf [file mmc1.pdf]

**Supplemental Data**

**CHARGE and Kabuki Syndromes: Gene-Specific DNA Methylation Signatures Identify Epigenetic Mechanisms Linking These Clinically Overlapping Conditions**

**Darci T. Butcher, Cheryl Cytrynbaum, Andrei L. Turinsky, Michelle T. Siu, Michal Inbar-Feigenberg, Roberto Mendoza-Londono, David Chitayat, Susan Walker, Jerry Machado, Oana Caluseriu, Lucie Dupuis, Daria Grafodatskaya, William Reardon, Brigitte Gilbert-Dussardier, Alain Verloes, Frederic Bilan, Jeff M. Milunsky, Raveen Basran, Blake Papsin, Tracy L. Stockley, Stephen W. Scherer, Sanaa Choufani, Michael Brudno, and Rosanna Weksberg**

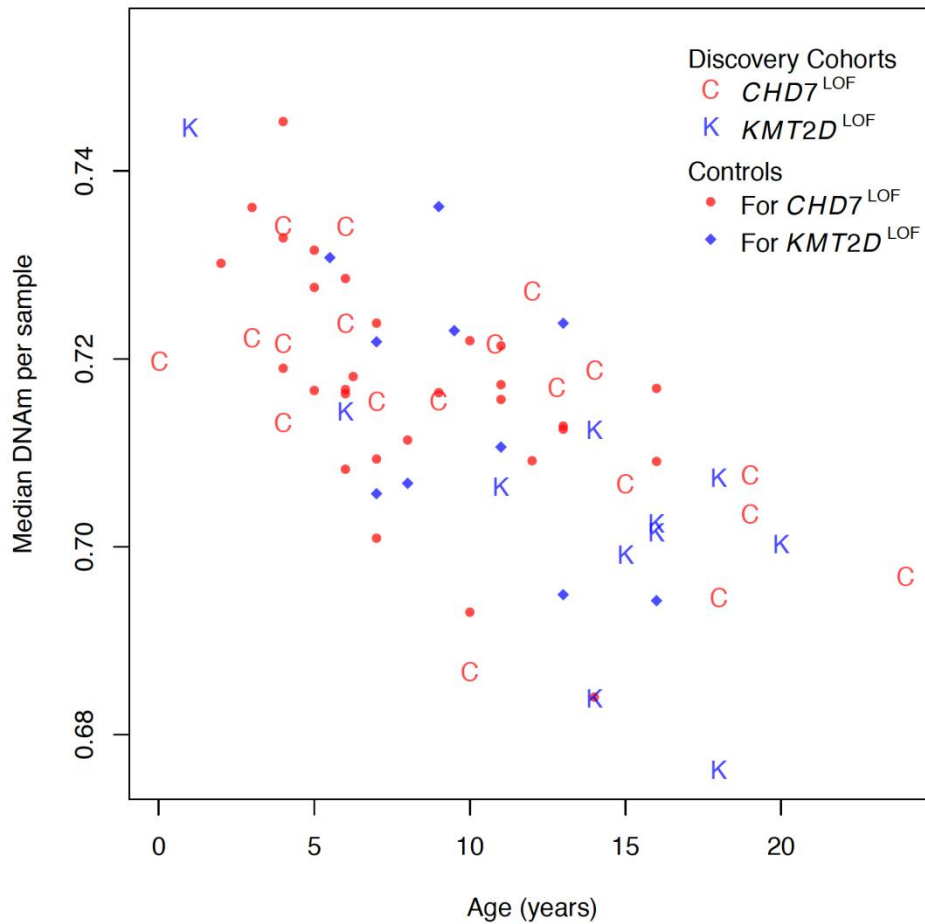

**Figure S1. Age distribution of the  $CHD7^{LOF}$  and  $KMT2D^{LOF}$  samples in the Discovery cohorts.** The age in years of the  $CHD7^{LOF}$  (red C),  $CHD7^{LOF}$  matching controls, (red circles),  $KMT2D^{LOF}$  (blue K) and  $KMT2D^{LOF}$  matching controls (blue diamonds) are plotted (X-axis) against the median DNAm per sample (Y-axis).

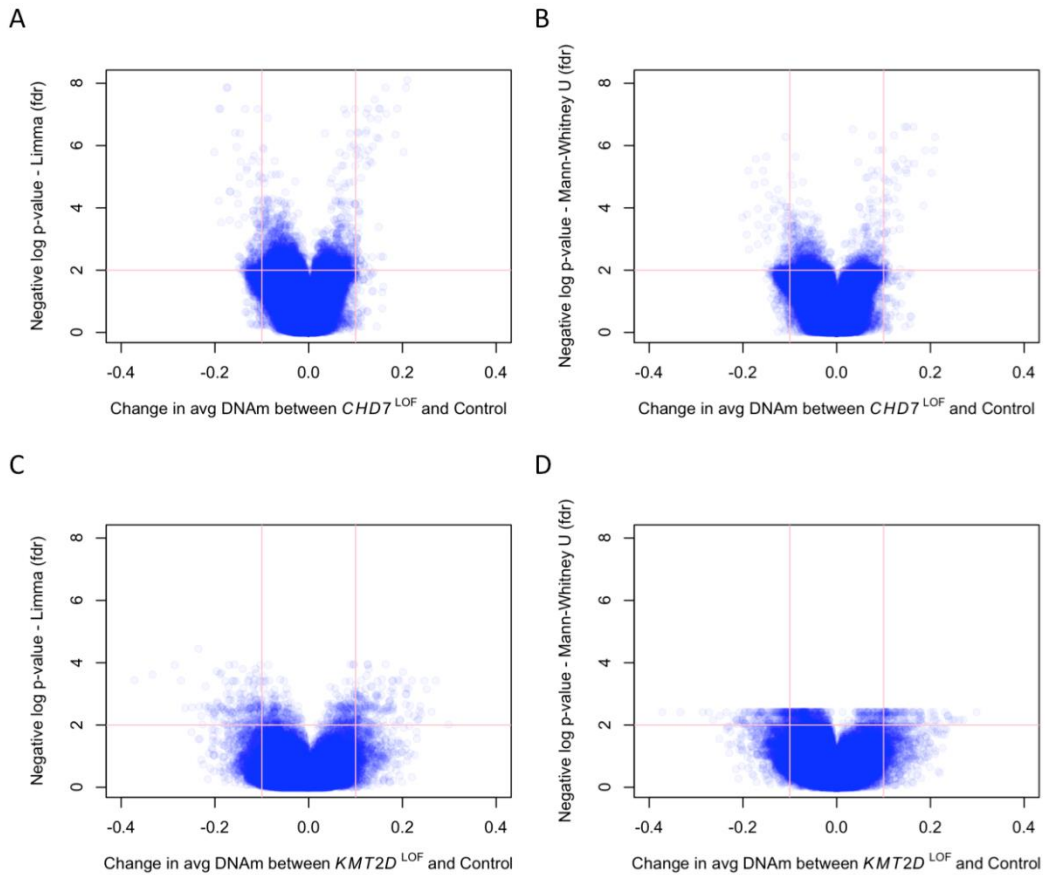

**Figure S2. Volcano plots shows the average gain/loss of DNAm using limma regression and Mann-Whitney U tests.** Average gain/loss of DNAm (X-axis) at all CpG sites are plotted against the statistical significance of such change after FDR correction for multiple testing (Y-axis, log-scale). Individual CpGs are indicated as semi-transparent circles. A) Average DNAm change in 19 *CHD7*<sup>LOF</sup> samples with respect to 29 matching controls, with the statistical significance derived from *limma* regression test. B) Average DNAm change in 19 *CHD7*<sup>LOF</sup> samples with respect to 29 matching controls, with the statistical significance derived from non-parametric Mann-Whitney U test. C) Average DNAm change in 11 *KMT2D*<sup>LOF</sup> samples with respect to 11 matching controls, with the statistical significance derived from *limma* regression test. D) Average DNAm change in 11 *KMT2D*<sup>LOF</sup> samples with respect to 11 matching controls, with the statistical significance derived from non-parametric Mann-Whitney U test. The FDR-adjusted significance level  $\alpha=0.01$  is shown as pink horizontal lines. The effect-size threshold of 10% DNAm difference is shown as pink vertical lines. Relatively few CpG sites have DNAm change over 10% by magnitude while also exhibiting the statistical significance level  $\alpha=0.01$ .

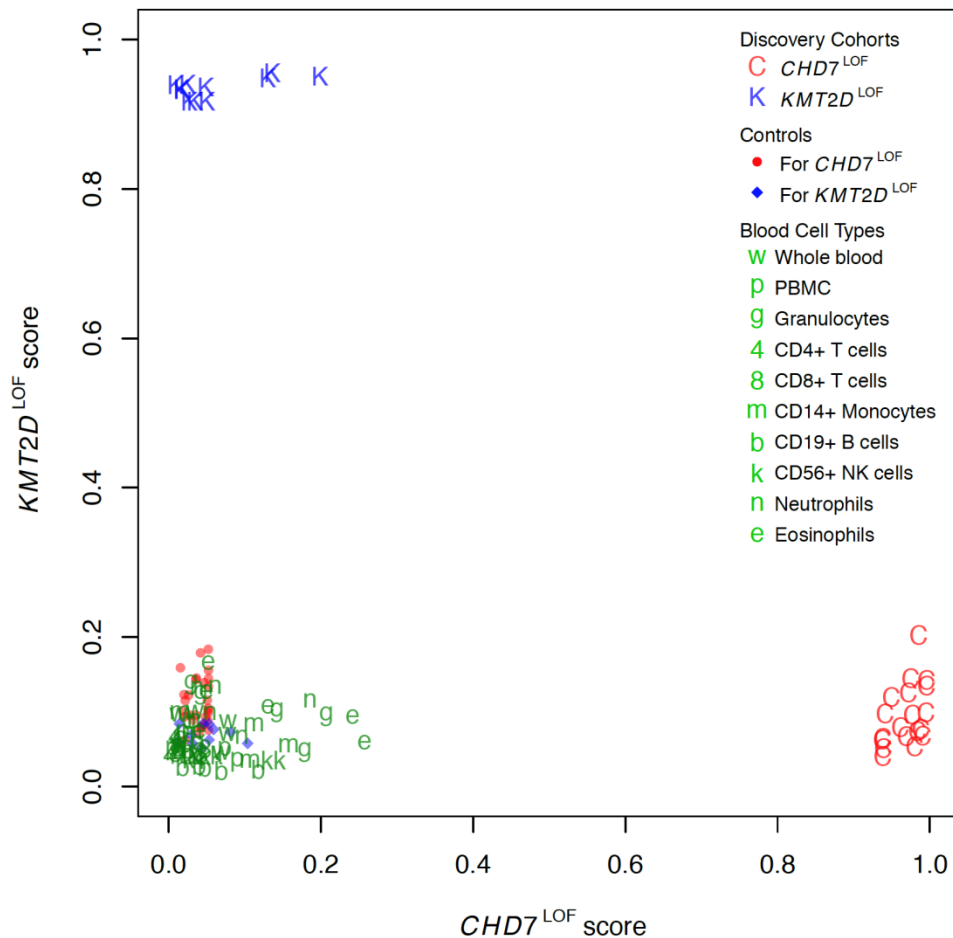

**Figure S3. Independence of blood cell type composition from the  $CHD7^{LOF}$  and  $KMT2D^{LOF}$  DNAm signatures.** We extracted DNAm data from Reinius *et al.*, 2012 (GEO: GSE35069) representing 6 samples from each of the following cell types: whole blood, peripheral blood mononuclear cells (PBMC), granulocytes, neutrophils, eosinophils, as well as isolated cell populations (CD4+ T cells, CD8+ T cells, CD56+ NK cells, CD19+ B cells, CD14+ monocytes). All cell-type samples received low scores from the two predictive models built for  $CHD7^{LOF}$  and  $KMT2D^{LOF}$  DNAm signatures (X-axis and Y-axis, respectively; compare to Figure 2 in the main text), demonstrating that the predictions are not biased by any of the cell types, and are therefore robust to cell-subtype composition.

A

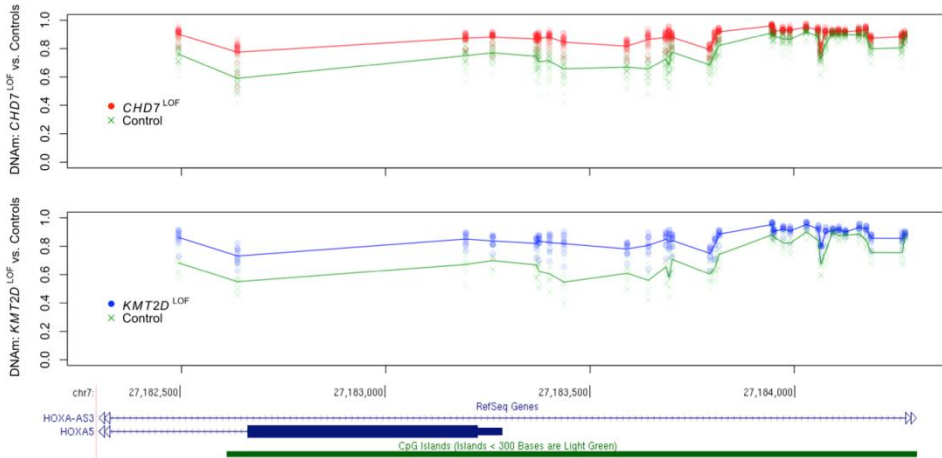

B

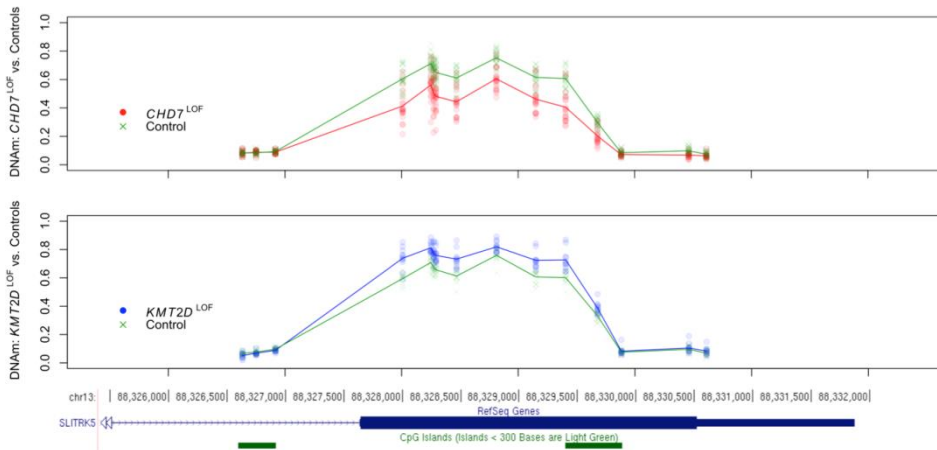

**Figure S4. Overlap in differentially methylated regions (DMR) associated with the  $CHD7^{LOF}$  and  $KMT2D^{LOF}$  mutations.** A) The DMR near the promoter of *HOXA5* shows a gain of methylation in both  $CHD7^{LOF}$  and  $KMT2D^{LOF}$  Discovery Cohorts. DNAm values are visualized as semi-transparent circles or crosses, arranged vertically for each CpG in the region spanning the candidate gene promoter. The X-axis shows the position of CpG site along the chromosome. The top panel shows the methylation level (Y-axis) for individual CpGs in each  $CHD7^{LOF}$  individual (red circles) and each matching control sample (green crosses). Also shown are group-average DNAm levels for the  $CHD7^{LOF}$  cohort (red line) and controls (green line). Similarly, the bottom panel shows the DNAm level (Y-axis) for individual CpGs in each  $KMT2D^{LOF}$  individual (blue circles) and each matching controls (green crosses). Also shown are the corresponding group averages (blue and green lines, respectively). The DMRs correspond to the gap between the lines showing the group-average DNAm levels. B) The DMR near the promoter of *SLITRK5* shows a loss of DNAm in  $CHD7^{LOF}$  but a gain of DNAm in  $KMT2D^{LOF}$  individuals.

**Table S1.** Molecular data for *CHD7*<sup>LOF</sup> and *CHD7* sequence variants.

a) *CHD7* Loss of Function Mutations (*CHD7*<sup>LOF</sup>) Analyzed to Derive the DNAm Signature

| <u>Sample ID</u> | <u>mutation DNA</u> | <u>mutation protein</u> | <u>coding effect/splice site mutation</u> |
|------------------|---------------------|-------------------------|-------------------------------------------|
| CHD7-1           | c.7282C>T           | p.Arg2428*              | nonsense                                  |
| CHD7-2           | c.3526C>T           | p.Gln1176*              | nonsense                                  |
| CHD7-3           | c.934C>T            | p.Arg312*               | nonsense                                  |
| CHD7-4           | c.562C>T            | p.Gly188*               | nonsense                                  |
| CHD7-5           | c.1327delATGGG      | p.Met443Asnfs*130       | frameshift                                |
| CHD7-6           | c.2504_2508delATCTT | p.Tyr835Serfs*14        | frameshift                                |
| CHD7-7           | c.1990G>T           | p.Glu664*               | nonsense                                  |
| CHD7-8           | c.3377dupT          | p.Leu1126Phefs*46       | frameshift                                |
| CHD7-9           | c.2585delA          | p.Leu862Serfs*26        | frameshift                                |
| CHD7-10          | c.2905_2906del      | p.Arg969Glyfs*25        | frameshift                                |
| CHD7-11          | c.7636G>T           | p.Glu2546*              | nonsense                                  |
| CHD7-12          | c.361delC           | p.Gly121Valfs*90        | frameshift                                |
| CHD7-13          | c.2504_2508delATCTT | p.Arg835Serfs*14        | frameshift                                |
| CHD7-14          | c.7717-7720del      | p.Gln2537*              | nonsense                                  |
| CHD7-15          | c.5458C>T           | p.Arg1820*              | nonsense                                  |
| CHD7-16          | exon 1 deletion     | ND                      | exon 1 deletion                           |
| CHD7-17          | c.5405-17G>A        | ND                      | splice site mutation                      |
| CHD7-18          | c.5405-7G>A         | ND                      | splice site mutation                      |
| CHD7-19          | c.2097-1G>A         | ND                      | splice site mutation                      |

b) *CHD7* Sequence Variants Classified Using the *CHD7*<sup>LOF</sup> DNAm Signature

| <u>Sample ID</u> | <u>mutation DNA</u>  | <u>mutation protein</u> | <u>coding effect/splice site mutation</u> |
|------------------|----------------------|-------------------------|-------------------------------------------|
| CHD7-20          | c.6322G>T            | p.Gly2108Trp            | missense                                  |
| CHD7-21          | c.3746G>A            | p.Arg1249Gln            | missense                                  |
| CHD7-22          | c.2751G>A            | p.= (p.Thr917Thr)       | synonymous                                |
| CHD7-23          | c.-15G>A             | ND                      | splice site mutation                      |
| CHD7-24          | c.4225G>A            | p.Val1409Met            | missense                                  |
| CHD7-25          | c.5436C>G            | p.Asp1812Glu            | missense                                  |
| CHD7-26          | c.5633A>G            | p.Asp1878Gly            | missense                                  |
| CHD7-27          | c.5848G>A            | p.Ala1950Thr            | missense                                  |
| CHD7-28          | c.6304G>T            | p.Val2102Phe            | missense                                  |
| CHD7-29          | c.3566G>A            | p.Arg1189His            | missense                                  |
| CHD7-30          | intron4:c2238+1del   | ND                      | splice site mutation                      |
| CHD7-31          | c.2049_2050insAAAGCA | p.Ala685_Lys686dup      | missense                                  |
| CHD7-32          | c.6377A>T            | p.Asp2126Val            | missense                                  |

Abbreviations

ND not determined

**Table S2.** Molecular data for *KMT2D*<sup>LOF</sup> and *KMT2D* sequence variants.

a) *KMT2D* Loss of Function Mutations (*KMT2D*<sup>LOF</sup>) Analyzed to Derive the DNAm Signature

| <u>Sample ID</u> | <u>mutation DNA</u> | <u>mutation protein</u> | <u>Coding Effect</u> |
|------------------|---------------------|-------------------------|----------------------|
| KMT2D-1          | c.15061C>T          | p.Arg5021*              | nonsense             |
| KMT2D-2          | c.16318delG         | p.Glu5440Argfs*16       | frameshift           |
| KMT2D-3          | c15030dupA          | p.Glu5011Argfs*13       | frameshift           |
| KMT2D-4          | c.8172_8173delC     | p.Phe2724Glnfs*5        | frameshift           |
| KMT2D-5          | c.6595delT          | p.Tyr2199Ilefs*65       | frameshift           |
| KMT2D-6          | c.14055-14056delCA  | p.His4685Glnfs*4        | frameshift           |
| KMT2D-7          | c.6295C>T           | p.Arg2099*              | nonsense             |
| KMT2D-8          | c.4135_4136delA     | p.Met1379Valfs*52       | frameshift           |
| KMT2D-9          | c.12592C>T          | p.Arg4198*              | nonsense             |
| KMT2D-10         | c.4135_4136delA     | p.Met1379Valfs*52       | frameshift           |
| KMT2D-11         | c.11710C>T          | p.Gln3904*              | nonsense             |

b) *KMT2D* Sequence Variants Classified Using the *KMT2D*<sup>LOF</sup> DNAm Signature

| <u>Sample ID</u> | <u>mutation DNA</u>    | <u>mutation protein</u> | <u>Coding Effect/Splice Site Mutation</u> |
|------------------|------------------------|-------------------------|-------------------------------------------|
| KMT2D-12         | c.15143G>A             | p.Arg5048His            | missense                                  |
| KMT2D-13         | c.12028T>C             | p.Ser4010Pro            | missense                                  |
| KMT2D-14         | c.16522-5_16522-4delTT | ND                      | splice site mutation                      |
| KMT2D-15         | c.15910A>G             | p.Ile5304Val            | missense                                  |
| KMT2D-16         | c.15659G>A             | p.Arg5220His            | missense                                  |
| KMT2D-17         | c.10256A>G             | p.Asp3419Gly            | missense                                  |
| KMT2D-18         | c.8974G>A              | p.Glu2992Lys            | missense                                  |
| KMT2D-19         | c.8831A>G              | p.Asn2944Ser            | missense                                  |
| KMT2D-20         | c.832G>A               | p.Ala278Thr             | missense                                  |
| KMT2D-21         | c.682C>G               | p.Arg228Gly             | missense                                  |

Abbreviations

ND not determined

**Table S5.** Validation cohort and classification utilizing *CHD7*<sup>LOF</sup> and *KMT2D*<sup>LOF</sup> signatures.

a) Validation Samples with *CHD7* Mutations Classified Using the *CHD7*<sup>LOF</sup> DNAm Signature

| SampleID | Signature (positive/negative) | Gene        | Mutation          | Protein Change           | Coding Effect/Splice Site Mutation |
|----------|-------------------------------|-------------|-------------------|--------------------------|------------------------------------|
| CHD7-33  | negative                      | <i>CHD7</i> | c.4851T>G         | p.=(p.Gly1617Gly)        | synonymous                         |
| CHD7-34  | positive                      | <i>CHD7</i> | c.5097dupA        | p.Ala1700Serfs*37        | frameshift                         |
| CHD7-35  | positive                      | <i>CHD7</i> | c.8791 G>A        | p.Val2931Met             | missense                           |
| CHD7-36  | positive                      | <i>CHD7</i> | c.799G>T          | p.Glu267*                | nonsense                           |
| CHD7-37  | negative                      | <i>CHD7</i> | c.8802C>G         | p.Ser2934Arg             | missense                           |
| CHD7-38  | positive                      | <i>CHD7</i> | c.2516_2518delAGT | p.Gln839_Trp840delinsArg | in-frame deletion                  |
| CHD7-39  | negative                      | <i>CHD7</i> | c.8759G>C         | p.Gly2920Ala             | missense                           |
| CHD7-40  | positive                      | <i>CHD7</i> | c.1312C>T         | p.Gln438*                | nonsense                           |
| CHD7-41  | positive                      | <i>CHD7</i> | c.6322G>A         | p.Gly2108Arg             | missense                           |
| CHD7-42  | positive                      | <i>CHD7</i> | c.127A>G          | p.Ile43Val               | missense                           |
| CHD7-43  | negative                      | <i>CHD7</i> | c.1405A>G         | p.Arg469Gly              | missense                           |
| CHD7-44  | positive                      | <i>CHD7</i> | c.7763A>G         | p.Asn2588Ser             | missense                           |
| CHD7-45  | positive                      | <i>CHD7</i> | c.3871A>C         | p.Lys1291Gln             | missense                           |
| CHD7-46  | positive                      | <i>CHD7</i> | c.5050G>A         | p.Gly1684Ser             | missense                           |
| CHD7-47  | positive                      | <i>CHD7</i> | c.5210+3A>G       | ND                       | splice site mutation               |
| CHD7-48  | positive                      | <i>CHD7</i> | c.6193C>T         | p.Arg2065Cys             | missense                           |
| CHD7-49  | positive                      | <i>CHD7</i> | c.3762T>A         | p.His1254Gln             | missense                           |
| CHD7-50  | negative                      | <i>CHD7</i> | c.583C>T          | p.Arg195Cys              | missense                           |
| CHD7-51  | positive                      | <i>CHD7</i> | c.4087delC        | p.Leu1363Serfs*9         | frameshift                         |
| CHD7-52  | positive                      | <i>CHD7</i> | c.2498+1G>T       | ND                       | splice site mutation               |
| CHD7-53  | positive                      | <i>CHD7</i> | c.1918delG        | p.Gly640Lysfs*71         | frameshift                         |
| CHD7-54  | negative                      | <i>CHD7</i> | c.1562C>T         | p.Pro521Leu              | missense                           |
| CHD7-55  | positive                      | <i>CHD7</i> | c.604 C>T         | p.Gln202*                | nonsense                           |
| CHD7-56  | positive                      | <i>CHD7</i> | c.4393C>T         | p.Arg1465*               | nonsense                           |
| CHD7-57  | positive                      | <i>CHD7</i> | c.5666-9C>G       | ND                       | splice site mutation               |
| CHD7-58  | positive                      | <i>CHD7</i> | c.5029C>T         | p.Arg1677*               | nonsense                           |
| CHD7-59  | negative                      | <i>CHD7</i> | c.1797_1799delGAA | p.Lys602del              | in-frame deletion                  |
| CHD7-60  | positive                      | <i>CHD7</i> | c.3177T>G         | p.Tyr1059*               | nonsense                           |
| CHD7-61  | positive                      | <i>CHD7</i> | c.2839C>T         | p.Arg947*                | nonsense                           |
| CHD7-62  | positive                      | <i>CHD7</i> | c.5429G>C         | p.Arg1810Pro             | missense                           |
| CHD7-63  | positive                      | <i>CHD7</i> | c.4361_4362delAG  | p.Gln1454Profs*21        | frameshift                         |
| CHD7-64  | positive                      | <i>CHD7</i> | c.2362C>T         | p.Gln788*                | nonsense                           |
| CHD7-65  | negative                      | <i>CHD7</i> | c.5827C>T         | p.Arg1943Trp             | missense                           |
| CHD7-66  | negative                      | <i>CHD7</i> | c.317A>G          | p.His106Arg              | missense                           |
| CHD7-67  | negative                      | <i>CHD7</i> | c.6529G>A         | p.Gln2177Lys             | missense                           |
| CHD7-68  | positive                      | <i>CHD7</i> | c.8507delC        | p.Pro2836Argfs*53        | frameshift                         |
| CHD7-69  | positive                      | <i>CHD7</i> | c.3655C>T         | p.Arg1219*               | nonsense                           |
| CHD7-70  | positive                      | <i>CHD7</i> | c.6356A>G         | p.Asp2119Gly             | missense                           |
| CHD7-71  | positive                      | <i>CHD7</i> | c.1141_1142delAT  | p.Met381Alafs*23         | frameshift                         |
| CHD7-72  | positive                      | <i>CHD7</i> | c.3082A>G         | p.Ile1028Val             | missense                           |

b) Validation Samples with *KMT2D* or *KDM6A* Mutations Classified Using the *KMT2D*<sup>LOF</sup> DNAm Signature

| SampleID | Signature (positive/negative) | Gene         | Mutation            | Protein Change    | Coding Effect/Splice Site Mutation |
|----------|-------------------------------|--------------|---------------------|-------------------|------------------------------------|
| KDM6A-1  | positive                      | <i>KDM6A</i> | c.2668_2669dupTA    | p.Pro891Thrfs*8   | frameshift                         |
| KMT2D-22 | positive                      | <i>KMT2D</i> | c.11158C>T          | p.Gln3720*        | nonsense                           |
| KMT2D-23 | negative                      | <i>KMT2D</i> | c.15587T>A          | p.Met5196Lys      | missense                           |
| KMT2D-24 | negative                      | <i>KMT2D</i> | c.11150A>C          | p.Gln3717Pro      | missense                           |
| KMT2D-25 | positive                      | <i>KMT2D</i> | c.16521+1G>T        | ND                | splice site mutation               |
| KMT2D-26 | positive                      | <i>KMT2D</i> | c.1940dupC          | p.Pro648Thrfs*2   | frameshift                         |
| KMT2D-27 | negative                      | <i>KMT2D</i> | c.11578_11580dupCAG | p.Gln3863dup      | in-frame duplication               |
| KMT2D-28 | negative                      | <i>KMT2D</i> | c.10909C>A          | p.Pro3637Thr      | missense                           |
| KMT2D-29 | positive                      | <i>KMT2D</i> | c.15088C>T          | p.Arg5030Cys      | missense                           |
| KMT2D-30 | positive                      | <i>KMT2D</i> | c.5135delA          | p.Lys1712Argfs*10 | frameshift                         |
| KMT2D-31 | negative                      | <i>KMT2D</i> | c.12662_12664dupAGC | p.Gln4221dup      | in-frame duplication               |
| KMT2D-32 | positive                      | <i>KMT2D</i> | c.16052G>A          | p.Arg5351Gln      | missense                           |
| KMT2D-33 | positive                      | <i>KMT2D</i> | c.11203C>T          | p.Gln3735*        | nonsense                           |
| KMT2D-34 | negative                      | <i>KMT2D</i> | c.2334C>G           | p.Cys778Trp       | missense                           |
| KMT2D-35 | negative                      | <i>KMT2D</i> | c.14731_14733delCCT | p.Pro4911del      | in-frame deletion                  |
| KMT2D-36 | positive                      | <i>KMT2D</i> | c.15536G>A          | p.Arg5179His      | missense                           |
| KMT2D-37 | positive                      | <i>KMT2D</i> | c.15626G>T          | p.Gly5209Val      | missense                           |

Abbreviations

|     |                                  |
|-----|----------------------------------|
| n/a | not applicable                   |
| ND  | not determined                   |
| VUS | Variants of unknown significance |



| Variant Designation | Align GVGD | SIFT (score)       | Mutation Taster (p-value) | PolyPhen-2 (score)        | ESEfinder Splicing Predictions |
|---------------------|------------|--------------------|---------------------------|---------------------------|--------------------------------|
| VUS                 | n/a        | n/a                | n/a                       | n/a                       | n/a                            |
| Pathogenic          | n/a        | n/a                | n/a                       | n/a                       | n/a                            |
| VUS                 | Class C0   | Tolerated (0.21)   | Disease Causing (0.998)   | probably damaging (0.998) | n/a                            |
| Pathogenic          | n/a        | n/a                | n/a                       | n/a                       | n/a                            |
| VUS                 | Class C0   | Tolerated (0.15)   | polymorphism (0.998)      | benign (0.001)            | n/a                            |
| VUS                 | n/a        | n/a                | n/a                       | n/a                       | n/a                            |
| VUS                 | Class C0   | Deleterious (0)    | Disease Causing (1)       | probably damaging (0.999) | n/a                            |
| Pathogenic          | n/a        | n/a                | n/a                       | n/a                       | n/a                            |
| Pathogenic          | Class C65  | Deleterious (0)    | Disease Causing (1)       | probably damaging (1)     | n/a                            |
| VUS                 | Class C0   | Tolerated (0.23)   | Polymorphism (0.998)      | benign (0.001)            | n/a                            |
| VUS                 | Class C0   | Tolerated (0.09)   | Disease Causing (0.99)    | probably damaging (0.963) | n/a                            |
| VUS                 | Class C0   | Tolerated (0.72)   | Disease Causing (0.999)   | benign (0.032)            | n/a                            |
| VUS                 | Class C45  | Deleterious (0)    | Disease Causing (1)       | probably damaging (1)     | n/a                            |
| Pathogenic          | ClassC55   | Deleterious (0)    | Disease Causing (1)       | probably damaging (0.990) | n/a                            |
| Pathogenic          | n/a        | n/a                | n/a                       | n/a                       | no ESE prediction disruption   |
| VUS                 | Class C45  | Deleterious (0)    | Disease Causing (1)       | probably damaging (1)     | n/a                            |
| VUS                 | Class C15  | Deleterious (0)    | Disease Causing (1)       | probably damaging (0.988) | n/a                            |
| VUS                 | Class C15  | Deleterious (0.03) | Disease Causing (1)       | probably damaging (0.997) | n/a                            |
| Pathogenic          | n/a        | n/a                | n/a                       | n/a                       | n/a                            |
| Pathogenic          | n/a        | n/a                | n/a                       | n/a                       | unclear prediction             |
| Pathogenic          | n/a        | n/a                | n/a                       | n/a                       | n/a                            |
| VUS                 | Class C0   | Tolerated (0.36)   | Disease Causing (1)       | benign (0.072)            | n/a                            |
| Pathogenic          | n/a        | n/a                | n/a                       | n/a                       | n/a                            |
| Pathogenic          | n/a        | n/a                | n/a                       | n/a                       | n/a                            |
| VUS                 | n/a        | n/a                | n/a                       | n/a                       | disrupts SRp40 site            |
| Pathogenic          | n/a        | n/a                | n/a                       | n/a                       | n/a                            |
| VUS                 | n/a        | n/a                | n/a                       | n/a                       | n/a                            |
| Pathogenic          | n/a        | n/a                | n/a                       | n/a                       | n/a                            |
| Pathogenic          | n/a        | n/a                | n/a                       | n/a                       | n/a                            |
| VUS                 | Class C65  | Deleterious (0)    | Disease Causing (1)       | probably damaging (1)     | n/a                            |
| Likely Pathogenic   | n/a        | n/a                | n/a                       | n/a                       | n/a                            |
| Pathogenic          | n/a        | n/a                | n/a                       | n/a                       | n/a                            |
| VUS                 | Class C0   | Deleterious (0)    | Disease Causing (1)       | probably damaging (0.998) | n/a                            |
| VUS                 | Class C0   | Tolerated (0.19)   | Disease Causing (1)       | possibly damaging (0.634) | n/a                            |
| VUS                 | Class C0   | Tolerated (0.9)    | Disease Causing (0.963)   | benign (0.006)            | n/a                            |
| Likely Pathogenic   | n/a        | n/a                | n/a                       | n/a                       | n/a                            |
| Pathogenic          | n/a        | n/a                | n/a                       | n/a                       | n/a                            |
| VUS                 | Class C0   | Tolerated (0.06)   | Disease Causing (1)       | probably damaging (1)     | n/a                            |
| Likely Pathogenic   | n/a        | n/a                | n/a                       | n/a                       | n/a                            |
| Pathogenic          | Class C25  | Deleterious (0)    | Disease Causing (1)       | possibly damaging (0.752) | n/a                            |

| Variant Designation | Align GVGD | SIFT (score)       | Mutation Taster(p-value) | PolyPhen-2 (score)        | ESEfinder Splicing Predictions |
|---------------------|------------|--------------------|--------------------------|---------------------------|--------------------------------|
| Pathogenic          | n/a        | n/a                | n/a                      | n/a                       | n/a                            |
| Likely Pathogenic   | n/a        | n/a                | n/a                      | n/a                       | n/a                            |
| VUS                 | Class C0   | Deleterious (0.01) | Disease Causing (1)      | probably damaging (0.986) | n/a                            |
| VUS                 | Class C0   | Tolerated (0.22)   | Disease Causing (1)      | probably damaging (0.999) | n/a                            |
| Likely Pathogenic   | n/a        | n/a                | n/a                      | n/a                       | disrupts a SF2/ASFsite         |
| Likely Pathogenic   | n/a        | n/a                | n/a                      | n/a                       | n/a                            |
| VUS                 | n/a        | n/a                | n/a                      | n/a                       | n/a                            |
| VUS                 | Class C0   | Tolerated (0.18)   | polymorphism (0.506)     | possibly damaging (0.900) | n/a                            |
| Pathogenic          | Class C0   | Deleterious (0)    | Disease Causing (1)      | possibly damaging (1)     | n/a                            |
| Likely Pathogenic   | n/a        | n/a                | n/a                      | n/a                       | n/a                            |
| VUS                 | n/a        | n/a                | n/a                      | n/a                       | n/a                            |
| Pathogenic          | Class C0   | Deleterious (0.02) | Disease Causing (1)      | probably damaging (1)     | n/a                            |
| Likely Pathogenic   | n/a        | n/a                | n/a                      | n/a                       | n/a                            |
| VUS                 | Class C0   | Tolerated (0.08)   | polymorphism (1)         | possibly damaging (0.758) | n/a                            |
| VUS                 | n/a        | n/a                | n/a                      | n/a                       | n/a                            |
| Pathogenic          | Class C0   | Deleterious (0)    | disease causing (1)      | possible damaging (0.840) | n/a                            |
| VUS                 | Class C0   | Deleterious (0)    | Disease Causing (1)      | probably damaging (1)     | n/a                            |

**Table S14.** Sequences of primers used for sodium bisulfite pyrosequencing validation.

|                       |                                | PCR product size |
|-----------------------|--------------------------------|------------------|
| <u><i>SLITRK5</i></u> |                                | 170bp            |
| SLITRK5F              | TGGGAAATTGTATTTGTTGTAGGTGT     |                  |
| SLITRK5R              | ACTCCACAACCTTATCCATATACTAC     |                  |
| SLITRK5S              | ACTACAAAAACCCAC                |                  |
| <u><i>MYOF1</i></u>   |                                | 183bp            |
| MYOF1F                | GATTTATTGGAGTTTTTGGGTAGT       |                  |
| MYOF1R                | CCCCAAACTTTCTTCTCT             |                  |
| MYOF1S                | GAAGTAGAGGGAGAAGGT             |                  |
| <u><i>FOXP2</i></u>   |                                | 248bp            |
| FOXP2F                | AGAAAGATTATGGTAAGTATGTTGGTTTAG |                  |
| FOXP2R                | CCACCATCAAACAACCTTTACAACAA     |                  |
| FOXP2S                | TGATTAAATGTTGATTTTGTGTA        |                  |
| <u><i>HOXA5</i></u>   |                                | 160bp            |
| HOXA5-F4              | TGAATTATGGAAATGATTGGGATATGTAT  |                  |
| HOXA5-R4              | TCCACCCAACCTCCCCTATTA          |                  |
| HOXA5-S4              | AGGTATTTAAATATGGGGT            |                  |
