# Supplementary material for: CHARGE and Kabuki Syndromes: Gene-Specific DNA Methylation Signatures Identify Epigenetic Mechanisms Linking These Clinically Overlapping Conditions
Source: PubMed Central journal article supplement — Am J Hum Genet. 2017 May 4;100(5):773–88. doi: 10.1016/j.ajhg.2017.04.004 (PMC5420353; doi:10.1016/j.ajhg.2017.04.004), 2017-05-04
Supplement: mmc3.pdf [file mmc3.pdf]

# CHARGE and Kabuki Syndromes: Gene-Specific DNA Methylation Signatures Identify Epigenetic Mechanisms Linking These Clinically Overlapping Conditions

Darci T. Butcher,<sup>1,2,3</sup> Cheryl Cytrynbaum,<sup>1,2,3,23</sup> Andrei L. Turinsky,<sup>1,4,23</sup> Michelle T. Siu,<sup>1</sup> Michal Inbar-Feigenberg,<sup>2,5</sup> Roberto Mendoza-Londono,<sup>1,2,5</sup> David Chitayat,<sup>2,3,5,6</sup> Susan Walker,<sup>1,7</sup> Jerry Machado,<sup>8</sup> Oana Caluseriu,<sup>9</sup> Lucie Dupuis,<sup>2</sup> Daria Grafodatskaya,<sup>10</sup> William Reardon,<sup>11</sup> Brigitte Gilbert-Dussardier,<sup>12</sup> Alain Verloes,<sup>13</sup> Frederic Bilan,<sup>12</sup> Jeff M. Milunsky,<sup>14</sup> Raveen Basran,<sup>15,16</sup> Blake Papsin,<sup>17,18,19</sup> Tracy L. Stockley,<sup>16,20</sup> Stephen W. Scherer,<sup>1,3,7,21</sup> Sanaa Choufani,<sup>1</sup> Michael Brudno,<sup>1,4,22</sup> and Rosanna Weksberg<sup>1,2,3,5,19,\*</sup>

Epigenetic dysregulation has emerged as a recurring mechanism in the etiology of neurodevelopmental disorders. Two such disorders, CHARGE and Kabuki syndromes, result from loss of function mutations in chromodomain helicase DNA-binding protein 7 (*CHD7*<sup>LOF</sup>) and lysine (K) methyltransferase 2D (*KMT2D*<sup>LOF</sup>), respectively. Although these two syndromes are clinically distinct, there is significant phenotypic overlap. We therefore expected that epigenetically driven developmental pathways regulated by *CHD7* and *KMT2D* would overlap and that DNA methylation (DNAm) alterations downstream of the mutations in these genes would identify common target genes, elucidating a mechanistic link between these two conditions, as well as specific target genes for each disorder. Genome-wide DNAm profiles in individuals with CHARGE and Kabuki syndromes with *CHD7*<sup>LOF</sup> or *KMT2D*<sup>LOF</sup> identified distinct sets of DNAm differences in each of the disorders, which were used to generate two unique, highly specific and sensitive DNAm signatures. These DNAm signatures were able to differentiate pathogenic mutations in these two genes from controls and from each other. Analysis of the DNAm targets in each gene-specific signature identified both common gene targets, including homeobox A5 (*HOXA5*), which could account for some of the clinical overlap in CHARGE and Kabuki syndromes, as well as distinct gene targets. Our findings demonstrate how characterization of the epigenome can contribute to our understanding of disease pathophysiology for epigenetic disorders, paving the way for explorations of novel therapeutics.

## Introduction

Genes that function in epigenetic regulation (epigenes), including those involved in chromatin remodeling and histone modifications, are increasingly being identified in the etiology of a variety of neurodevelopmental disorders. Two such disorders include CHARGE syndrome [MIM: 214800], caused by heterozygous mutations in chromodomain helicase DNA-binding protein 7 (*CHD7* [MIM: 608892]), and Kabuki syndrome [MIM: 147920] caused by heterozygous mutations in lysine (K)-specific methyltransferase 2D (*KMT2D* [MIM: 602113]).<sup>1,2</sup> CHARGE syndrome is characterized by Coloboma, Heart defects, Atresia of the choanae, Retardation of growth

and development, Genital hypoplasia, and Ear abnormalities including deafness and vestibular disorders. Kabuki syndrome is characterized by a typical facial gestalt, post-natal growth deficiency, congenital heart defects, hearing loss and intellectual disability as well as skeletal, dermatoglyphic, genitourinary, and ophthalmologic anomalies (including coloboma). There is extensive clinical overlap between these two syndromes and clinical distinction can be particularly challenging in early life as the characteristic facial features of Kabuki syndrome often become apparent with age.<sup>3,4</sup> A molecular link between *CHD7* and *KMT2D* function has been proposed via their known interaction with members of the WAR complex (*WDR5* [WD-repeat protein 5], *ASH2L* [absent, small, homeotic

<sup>1</sup>Genetics and Genome Biology, The Hospital for Sick Children, Toronto, Ontario M5G 1X8, Canada; <sup>2</sup>Division of Clinical and Metabolic Genetics, The Hospital for Sick Children, Toronto, Ontario M5G 1X8, Canada; <sup>3</sup>Department of Molecular Genetics, University of Toronto, Toronto, Ontario, M5S 1A1, Canada; <sup>4</sup>Centre for Computational Medicine, The Hospital for Sick Children, Toronto, Ontario M5G 1X8, Canada; <sup>5</sup>Department of Pediatrics, University of Toronto, Toronto, Ontario, M5S 1A1, Canada; <sup>6</sup>Prenatal Diagnosis and Medical Genetics Program, Mount Sinai Hospital, Toronto, Ontario, M5G 1X5, Canada; <sup>7</sup>The Centre for Applied Genomics, The Hospital for Sick Children, Toronto, Ontario M5G 1X8 Canada; <sup>8</sup>PreventionGenetics, Marshfield, WI, 54449, USA; <sup>9</sup>Department of Medical Genetics, University of Alberta, Edmonton, Alberta, T6G 2R3, Canada; <sup>10</sup>Pathology and Molecular Medicine, McMaster University, Hamilton, Ontario, L8S 4L8, Canada; <sup>11</sup>National Centre for Medical Genetics, Our Lady's Children's Hospital, Crumlin, Dublin 12, Ireland; <sup>12</sup>Service de Génétique, Centre de Référence Anomalies du Développement de l'Ouest, CHU Poitiers, 86021 Poitiers, France; EA3808, Université de Poitiers, France; <sup>13</sup>Département de Génétique, APHP-Hôpital Robert DEBRE, 75019 Paris, France; <sup>14</sup>Center for Human Genetics Inc., Cambridge, MA 02139, USA; <sup>15</sup>Paediatric Laboratory Medicine, The Hospital for Sick Children, Toronto, Ontario M5G 1X8 Canada; <sup>16</sup>Laboratory Medicine and Pathobiology, University of Toronto, Toronto, Ontario, M5S 1A1, Canada; <sup>17</sup>Otolaryngology, The Hospital for Sick Children, Toronto, Ontario M5G 1X8, Canada; <sup>18</sup>Department of Otolaryngology, University of Toronto, Toronto, Ontario, M5S 1A1, Canada; <sup>19</sup>Institute of Medical Sciences, University of Toronto, Toronto, Ontario M5S 1A8, Canada; <sup>20</sup>Genome Diagnostics, Department of Clinical Laboratory Genetics, University Health Network, Canada; <sup>21</sup>McLaughlin Centre, University of Toronto, Toronto, Ontario, M5S 1A1, Canada; <sup>22</sup>Department of Computer Science, University of Toronto, Toronto, Ontario, M5S 1A1, Canada

<sup>23</sup>These authors contributed equally to this work

\*Correspondence: [rweksbs@sickkids.ca](mailto:rweksbs@sickkids.ca)

<http://dx.doi.org/10.1016/j.ajhg.2017.04.004>

© 2017 The Author(s). This is an open access article under the CC BY-NC-ND license (<http://creativecommons.org/licenses/by-nc-nd/4.0/>).

discs-2-like], and also RBBP5 [retinoblastoma-binding protein-5]), which has been shown to be involved in histone methylation.<sup>5,6</sup> It has been suggested that *CHD7* and *KMT2D* might regulate a common subset of genes via their interaction with the WAR complex, which might explain the overlapping features in CHARGE and Kabuki syndromes.<sup>7</sup>

We and others have previously demonstrated that loss of function (LOF) mutations in epigenes can be associated with specific patterns of DNA methylation (DNAm) alterations that constitute unique signatures.<sup>8–10</sup> Specifically, unique DNAm signatures are observed in individuals harboring mutations in lysine-specific demethylase 5C (*KDM5C* [MIM: 314690]), which encodes an H3K4 demethylase and causes non-syndromic intellectual disability [MIM: 300534], DNA methyltransferase 1 (*DNMT1* [MIM: 126375]), which cause adult-onset autosomal dominant cerebellar ataxia with deafness and narcolepsy (ADCA-DN [MIM: 604121]), and nuclear receptor binding SET domain protein 1 (*NSD1* [MIM: 606681]) which encodes a histone methyltransferase and cause Sotos syndrome [MIM:117550].<sup>8–10</sup> Moreover, for *NSD1* we have shown that genes encoding proteins in growth and neurodevelopmental pathways are highly represented in the DNAm signature reflecting the pathophysiology of the disorder.<sup>8</sup> We hypothesized that comparison of genome-wide DNAm alterations in individuals with heterozygous LOF mutations in *CHD7* and *KMT2D*, respectively, would identify two disease-specific DNAm signatures that would include common target genes and biological pathways, reflecting the clinical overlap of these two conditions, as well as distinct target genes reflecting divergent clinical features.

Here we analyze DNAm using whole blood from individuals with a clinical diagnosis of either CHARGE or Kabuki syndrome with LOF mutations in *CHD7* (*CHD7*<sup>LOF</sup>) or *KMT2D* (*KMT2D*<sup>LOF</sup>), respectively. When compared to controls, *CHD7*<sup>LOF</sup> and *KMT2D*<sup>LOF</sup> demonstrate specific sets of differentially methylated CpGs, which we defined as two unique DNAm signatures. We show that the *CHD7*<sup>LOF</sup> and *KMT2D*<sup>LOF</sup> DNAm signatures both demonstrate high sensitivity and specificity, not only differentiating individuals with LOF mutations from controls but also differentiating individuals with *CHD7*<sup>LOF</sup> and *KMT2D*<sup>LOF</sup> from each other. As such, these DNAm signatures can offer a molecular means of distinguishing between CHARGE and Kabuki syndromes when clinical distinction is challenging. We also demonstrate that the specific DNAm signatures can be used to differentiate pathogenic mutations in *CHD7* and *KMT2D* from benign sequence variants. Finally, analysis of the DNAm gene targets identified in the *CHD7*<sup>LOF</sup> and *KMT2D*<sup>LOF</sup>-specific DNAm signatures show gain of DNAm at homeobox A5 (*HOXA5* [MIM: 142592]) in both signatures, which may account for some of the clinical overlap observed in CHARGE and Kabuki syndromes. There are also distinct DNAm alterations in each of the signatures that likely

drive molecular pathways contributing to the distinct clinical features in these two syndromes.

## Material and Methods

### Research Participants

#### Discovery Cohort

Individuals with a clinical diagnosis of CHARGE syndrome and *CHD7* LOF mutations (nonsense, frameshift mutations resulting in a premature stop, exonic deletions, and splice site mutations) were recruited through the Division of Clinical and Metabolic Genetics at the Hospital for Sick Children in Toronto, Ontario, Service de Génétique, Centre de Référence Anomalies du Développement de l'Ouest, CHU Poitiers, France and Our Lady's Hospital for Sick Children in Dublin, Ireland (n = 19). Individuals with a clinical diagnosis of Kabuki syndrome and *KMT2D* LOF mutations (nonsense and frameshift mutations resulting in a premature stop) were recruited at the Hospital for Sick Children and the Center for Human Genetics, Inc. (n = 11). A detailed list of the specific *CHD7* (GenBank: NM\_017780.3) and *KMT2D* (GenBank: NM\_003482.3) LOF mutations, designated *CHD7*<sup>LOF</sup> and *KMT2D*<sup>LOF</sup> can be found in Tables S1 and S2. Phenotypic information on individuals with *CHD7*<sup>LOF</sup> and *KMT2D*<sup>LOF</sup> is provided in Tables S3 and S4. The majority of the individuals in our Discovery and control cohorts are of European descent: *CHD7*<sup>LOF</sup> (16/19); *CHD7*<sup>LOF</sup> cohort controls (28/29); *KMT2D*<sup>LOF</sup> (10/11); *KMT2D*<sup>LOF</sup> cohort controls (9/11). These cohorts were used for the derivation of the DNAm signatures. Informed consent was obtained from all research participants according to the protocol approved by the Research Ethics Board of the Hospital for Sick Children (REB#0019980189).

#### Validation Cohort

Anonymized DNA samples from individuals with *CHD7* or *KMT2D* sequence variants (n = 56) including pathogenic, likely pathogenic, and variants of uncertain significance (VUS) were obtained from PreventionGenetics, USA (Table S5). There was also one sample from an individual with a pathogenic mutation in lysine demethylase 6A (*KDM6A* c.2668\_2669dupTA (p.Pro891Thrfs\*8); GenBank: NM\_021140.2; [MIM: 300128]; Kabuki syndrome 2 [MIM: 300867]) in the anonymized cohort. All variants which differed from the reference sequences were interpreted using American College of Medical Genetics and Genomics (ACMG) Guidelines<sup>11</sup> with slight modifications, which include previously unpublished de novo LOF variants being reported as likely pathogenic, instead of pathogenic as is in the ACMG guidelines.

#### Cohort with *CHD7* and *KMT2D* Sequence Variants, Excluding LOF

Individuals with *CHD7* (n = 13) or *KMT2D* (n = 10) VUS including missense and splice site variants were recruited from the same institutions as the *CHD7* and *KMT2D* Discovery Cohorts (see above). Independent in silico prediction algorithms, namely PolyPhen-2,<sup>12</sup> SIFT,<sup>13</sup> Mutation Taster,<sup>14</sup> and ESE finder<sup>15,16</sup> were used to evaluate the pathogenicity of the mutations in each case (Tables 1 and 2). Phenotypic information available for the individuals is provided in Tables S3 and S4. Individuals with *CHD7* sequence variants underwent clinical classification utilizing the criteria established by Verloes<sup>17</sup> and Hale<sup>18</sup> (Table 1).

#### Control DNA Samples

Age- and sex- matched controls for our discovery and validation cohorts were obtained from three sources (Table S6). These included the Simons Simplex Collection (SSC; Simons Foundation Autism Research Initiative).<sup>19</sup> The Hospital for Sick Children, and The University of Michigan (Dr. Gregory Hanna).<sup>20</sup>

The controls were screened using various neurodevelopmental assessments.<sup>19,20</sup>

#### DNAm Data from Public Databases

Publically available Illumina HumanMethylation450 microarray data for an additional 162 blood controls, which were not expected to contain pathogenic mutations in either *CHD7* or *KMT2D*, were downloaded from the Gene Expression Omnibus (GEO) data repository, chosen from individuals younger than 50 years of age in five GEO series (GEO: GSE32148, GEO: GSE40279, GEO: GSE41169, GEO: GSE46648, GEO: GSE53128; see Table S7).

#### DNAm Data Processing

DNA samples were converted using sodium bisulfite (EpiTect PLUS Bisulfite Kit, QIAGEN). The sodium bisulfite converted DNA was then hybridized to the Illumina Infinium HumanMethylation450 BeadChip Array to interrogate over 480,000 CpG sites in the human genome. For both the Discovery and Validation cohorts, cases and controls were randomized on the arrays (modified from<sup>21</sup>). Illumina Genome Studio software was used to perform control probe normalization and background subtraction and to extract DNAm values ( $\beta$  values) for each CpG, which represent the percentage of methylated cytosines. These  $\beta$  values ranged between 0 (no methylation) and 1 (full methylation). We excluded probes located on sex chromosomes, autosomal probes that cross-react with sex chromosome probes, non-specific probes, and probes targeting CpG sites within 5bp of a SNP that has a minor allele frequency above 1%.<sup>22,23</sup> Subsequent analyses were performed on the remaining 363,979 probes.

#### *CHD7*<sup>LOF</sup> and *KMT2D*<sup>LOF</sup> DNAm Signatures

Differential DNAm between individuals with LOF mutations and controls at individual CpGs was identified using three criteria. First, we applied regression modeling implemented in the *limma* Bioconductor package to detect statistically significant differences in DNAm (false discovery rate [FDR] corrected p value < 0.01) attributed to either *CHD7*<sup>LOF</sup> or *KMT2D*<sup>LOF</sup> versus controls, while accounting for sex and age (Figure S1) as confounding factors in the model design matrix.<sup>24</sup> The *limma* models were applied to DNAm data logit-transformed into M-values.<sup>25</sup> Second, to account for possible effects related to non-normal distribution of DNAm values at individual CpG sites, we used the non-parametric Mann-Whitney U test at each probe to detect statistically significant DNAm differences (FDR corrected p values < 0.01) between the respective Discovery Cohorts (*CHD7*<sup>LOF</sup> or *KMT2D*<sup>LOF</sup>) and the control groups. Third, to ensure robust results, statistically significant probes were additionally filtered for effect size. Delta beta ( $\Delta\beta$ ) was defined for each probe as the difference between average DNAm in each Discovery Cohort and its control group, respectively. We retained only those significant probes for which the DNAm difference ( $\Delta\beta$ ) between *CHD7*<sup>LOF</sup> or *KMT2D*<sup>LOF</sup> and their controls was greater than 0.10 (10% DNAm difference).

The choice of the significance level  $p < 0.01$  and the 10% effect size threshold for both *CHD7*<sup>LOF</sup> and *KMT2D*<sup>LOF</sup> was guided by the volcano plots of the *limma* regression and the Mann-Whitney U test (Figure S2). The CpG sites that satisfied all three criteria defined the *CHD7*<sup>LOF</sup> and *KMT2D*<sup>LOF</sup> DNAm signatures, respectively (Tables S8 and S9).

#### Building Classification Models with the *CHD7*<sup>LOF</sup> and *KMT2D*<sup>LOF</sup> DNAm Signatures

Using the two DNAm signatures, we developed predictive models for scoring individuals with *CHD7* or *KMT2D* sequence variants,

based on their DNAm profiles. As the DNAm signatures for *CHD7*<sup>LOF</sup> and *KMT2D*<sup>LOF</sup> often appeared in groups corresponding to the same gene or region, the CpG sites were filtered for redundancy in order to be used as predictive data features for the respective models. We applied R *caret* software package to identify highly correlated CpGs and removed redundant data features (using the default threshold of 0.90 correlation in the *findCorrelations* function of *caret*). The remaining CpG sites were used to build the *CHD7*<sup>LOF</sup> and *KMT2D*<sup>LOF</sup> classification models.

We then built a support vector machine (SVM) model with linear kernel, using the non-redundant DNAm signatures as data features to predict the putative pathogenicity of each sequence variant. Model training was performed by the R *kernlab* software package via *caret*. The training set comprised the *CHD7*<sup>LOF</sup> or the *KMT2D*<sup>LOF</sup> and control samples from the Discovery Cohort. The model was set to return a quantitative predictive score between 0 and 1. The SVM scores were derived in *kernlab* using internally randomized cross-validation and thus exhibit slight variability. Therefore for each individual we determined the average score over 100 scoring trials. We then applied these models to samples from the Validation Cohort, another cohort with *CHD7* or *KMT2D* sequence variants (excluding LOF mutations) and GEO controls. High scores indicate putative pathogenicity of sequence variants in *CHD7* or *KMT2D*, and low scores suggest that the sequence variants are benign.

#### Assessment of Blood Cell Type Composition Effect

To ensure that the *CHD7*<sup>LOF</sup> and *KMT2D*<sup>LOF</sup> predictive models were not affected by variation in blood cell type composition, we examined 60 DNAm data samples from Reinius et al., 2012<sup>26</sup> (GEO: GSE35069). These data represent six healthy control whole-blood samples that were sorted into each of the following cell types: peripheral blood mononuclear cells (PBMC), granulocytes, neutrophils, eosinophils, as well as isolated cell populations (CD4<sup>+</sup> T cells, CD8<sup>+</sup> T cells, CD56<sup>+</sup> NK cells, CD19<sup>+</sup> B cells, CD14<sup>+</sup> monocytes). The *CHD7*<sup>LOF</sup> and *KMT2D*<sup>LOF</sup> DNAm signature classification results were plotted for the cell-type samples from Reinius et al., 2012,<sup>26</sup> together with the *CHD7*<sup>LOF</sup> or *KMT2D*<sup>LOF</sup> samples and the matching control samples from our Discovery Cohort (Figure S3). Our goal was to verify that none of the blood-cell subtypes were given high scores by either *CHD7*<sup>LOF</sup> or *KMT2D*<sup>LOF</sup> predictive models, confirming the lack of a confounding effect between blood-cell type composition and the DNAm signature-based predictions.

#### Differentially Methylated Regions in the *CHD7* and *KMT2D* Discovery Cohorts

To find genomic regions with DNAm differences in *CHD7*<sup>LOF</sup> or *KMT2D*<sup>LOF</sup>, we used the bump hunting method,<sup>27</sup> which strengthens the detection of regional differences by combining differential-methylation patterns across neighboring CpG sites.<sup>28</sup> The bump hunting design matrix accounted for the potential confounding effects of the sex and age factors. The analysis initially considered CpGs with  $\Delta\beta > 5\%$  by magnitude between cases and controls as candidates for the differentially methylation regions (DMRs), with gaps no more than 500 bp between neighboring CpGs. Statistical significance was established using 1,000 randomized bootstrap iterations, as is recommended in the Bioconductor *bumphunter* package documentation when accounting for confounders. The resulting DMRs were post-filtered to retain only those with p value < 0.01 and average methylation difference

$\Delta\beta > 10\%$  by magnitude across the DMR. To further improve robustness, we also required these DMRs to comprise at least three neighboring CpGs, of which at least one has been already been included in the DNAm signature set for either *CHD7*<sup>LOF</sup> or *KMT2D*<sup>LOF</sup>, as described above (Tables S10 and S11). DMRs are presented using visualization methods adapted from DMRcate software (Figure S4).<sup>29</sup>

### Functional Enrichment Analysis

To identify prominent functional enrichment patterns, we analyzed the list of differentially methylated CpGs in the context of wider genomic regions using GREAT.<sup>30</sup> We retained only the Gene Ontology (GO) Biological Process<sup>31</sup> functional categories for which at least three genes (including their genomic neighborhoods) were targeted by the *CHD7*<sup>LOF</sup> or *KMT2D*<sup>LOF</sup> specific DNAm signatures (Tables S12 and S13). The background set of probes to which the comparison was made was defined as the 363,979 autosomal CpGs used as the initial input to our analysis pipeline. All p values were FDR corrected.

### DNAm Validation by Sodium Bisulfite Pyrosequencing

Differential DNAm between the *CHD7*<sup>LOF</sup> and *KMT2D*<sup>LOF</sup> individuals in the Discovery Cohorts and matching controls was validated for selected genomic loci using pyrosequencing assays. These assays were designed using QIAGEN Assay Design Software v1.0.6 to target-specific CpGs identified by the microarray experiment, as well as adjacent sites (Table S14). DNAm was assessed for the following CpG sites: cg01370449, cg04863892 and cg19759481 (*HOXA5*, cg16787483; cg24626752 and cg09823859 (*SLITRK5*; *SLIT* and *NTRK* like family member 5 [MIM: 609680]); cg18546840 and cg18871253 (*FOXP2*; Forkhead box P2 [MIM: 605317]), and cg15254671 (*MYO1F*; myosin IF [MIM: 601480]). Pyrosequencing was done using the PyroMark Q24 system and Pyrosequencing Gold Reagents (QIAGEN). Testing for a statistical difference between all groups was performed using a Kruskal-Wallis test ( $p < 0.0001$ ).

## Results

### DNA Methylation Signatures for *CHD7*<sup>LOF</sup> and *KMT2D*<sup>LOF</sup>

To determine whether LOF mutations in *CHD7* (*CHD7*<sup>LOF</sup>) generate a specific pattern of DNAm alterations, we compared genome-wide DNAm patterns in 19 *CHD7*<sup>LOF</sup> individuals (*CHD7*<sup>LOF</sup> Discovery Cohort) and 29 matched controls. Volcano plots of the results of statistical criteria, specifically *limma* regression modeling, and non-parametric Mann-Whitney U tests, were used to determine a significance level  $p < 0.01$  and an effect size of a 10%  $\Delta\beta$  threshold (Figures S2A and S2B). We identified a set of 163 significant differentially methylated CpG sites for the *CHD7*<sup>LOF</sup> Discovery Cohort, defined as the *CHD7*<sup>LOF</sup> DNAm signature (Table S8). Unsupervised hierarchical clustering of the DNAm of each of the samples for these 163 CpGs sites clearly distinguished the *CHD7*<sup>LOF</sup> individuals from controls (Figure 1A).

Similarly, analysis of genome-wide DNAm patterns for 11 *KMT2D*<sup>LOF</sup> individuals (*KMT2D*<sup>LOF</sup> Discovery Cohort) and 11 matched controls identified a set of 221 significant differentially methylated CpGs for *KMT2D*<sup>LOF</sup>, defined as the *KMT2D*<sup>LOF</sup> DNAm signature (Table S9). Volcano plots

of the *limma* regression and the Mann-Whitney U test for the *KMT2D*<sup>LOF</sup> Discovery Cohort were used to determine the significance level  $p < 0.01$  and the 10% effect size (Figures S2C and S2D) to identify this set of CpGs. Unsupervised hierarchical clustering using the *KMT2D*<sup>LOF</sup> DNAm signature clearly distinguished the *KMT2D*<sup>LOF</sup> individuals from controls (Figure 1B).

### Predictive Modeling Using DNAm Signatures for *CHD7*<sup>LOF</sup> and *KMT2D*<sup>LOF</sup>

We used the DNAm signatures for the *CHD7* and *KMT2D* Discovery Cohorts to derive the classification signatures, by removing redundant data features. Removing redundancies from the initial collections of CpG sites (see Methods) resulted in a *CHD7*<sup>LOF</sup> DNAm classification signature comprising 75 CpGs and a *KMT2D*<sup>LOF</sup> DNAm classification signature comprised of 112 CpGs (Tables S8 and S9). Two SVM classification models were then built using the *CHD7* and *KMT2D* Discovery Cohort samples as training sets and the corresponding non-redundant DNAm signatures as data features.

### *CHD7*<sup>LOF</sup> and *KMT2D*<sup>LOF</sup> DNAm Signatures Are Independent of Blood Cell Type Composition

Both CHARGE and Kabuki syndromes can be associated with immune dysfunction although the sub-populations of T cells that are potentially altered represent a small fraction of the total lymphocytes.<sup>32,33</sup> To ensure that the predictive models were not affected by the variation in blood cell types, the two predictive models were applied to DNAm data from normal whole blood, peripheral blood mononuclear cells (PBMC), granulocytes, and isolated cell populations (CD4<sup>+</sup> T cells, CD8<sup>+</sup> T cells, CD56<sup>+</sup> NK cells, CD19<sup>+</sup> B cells, CD14<sup>+</sup> monocytes).<sup>26</sup> Prediction results demonstrated that all individual cell types received low predictive scores, placing them near other controls in our data (Figure S3). This suggests that the prediction of either *CHD7*<sup>LOF</sup> or *KMT2D*<sup>LOF</sup> status using the respective DNAm signatures is not influenced by a particular blood cell type within a sample. Clinical blood counts and differentials were available for 7 individuals with *CHD7* mutations (3 LOF; 4 sequence variants) and for 2 individuals with *KMT2D* mutations (1 LOF and 1 sequence variant), and all were within the normal range.

### Specificity of *CHD7*<sup>LOF</sup> and *KMT2D*<sup>LOF</sup> DNAm Classification Signatures

To quantify the specificity of the DNAm classification signatures and to confirm that the two models do not generate overlapping predictions, we applied the *CHD7*<sup>LOF</sup> predictive model to the *KMT2D*<sup>LOF</sup> cohort, and conversely the *KMT2D*<sup>LOF</sup> predictive model to the *CHD7*<sup>LOF</sup> cohort. None of the *KMT2D*<sup>LOF</sup> individuals or controls scored as putative *CHD7*<sup>LOF</sup> using the *CHD7*<sup>LOF</sup> classification signature, confirming that the *CHD7*<sup>LOF</sup> predictive model was specific to *CHD7*<sup>LOF</sup> (Figure 2). Similarly, none of the *CHD7*<sup>LOF</sup> individuals or controls scored as *KMT2D*<sup>LOF</sup>, confirming the

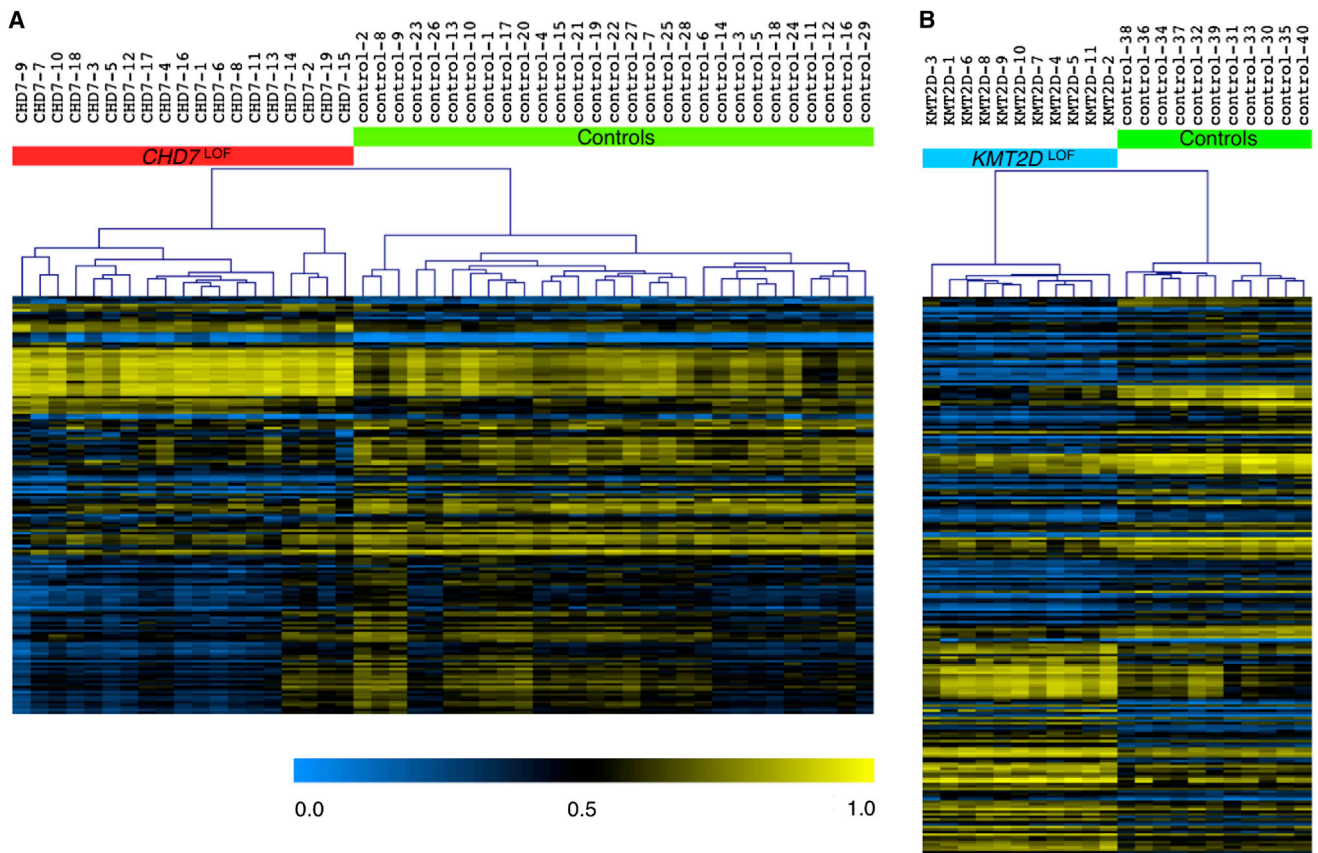

**Figure 1. Hierarchical Clustering of the Discovery Cohorts Using the  $CHD7^{LOF}$  and  $KMT2D^{LOF}$  DNAm Signatures**

The heatmap shows the unsupervised hierarchical clustering of (A) 19  $CHD7^{LOF}$  individuals and 29 matching controls samples, using only 163 differentially methylated CpG sites specific to  $CHD7^{LOF}$ . The color gradient of the heatmap indicates the methylation level, from low (blue) to high (yellow). DNAm profiles fall into two separate clusters corresponding to  $CHD7^{LOF}$  mutations (red) and controls (green). Euclidean distance metric is used in the clustering.

(B) 11  $KMT2D^{LOF}$  individuals and 11 matching controls samples, using only 221 differentially methylated CpG sites specific to  $KMT2D^{LOF}$ . DNAm profiles fall into two separate clusters corresponding to  $KMT2D^{LOF}$  mutations (blue) and controls (green).

specificity of the second model (Figure 2). Next we assessed the specificity of the predictive analysis on the collection of control blood DNAm data extracted from the GEO repository. All 162 GEO samples had low prediction scores for both  $CHD7^{LOF}$  and  $KMT2D^{LOF}$ , i.e., they were predicted not to have pathogenic mutations in  $CHD7$  or  $KMT2D$  by the corresponding models, demonstrating 100% specificity of the DNAm signatures (Figure 2).

#### Validation of $CHD7^{LOF}$ and $KMT2D^{LOF}$ DNAm Classification Signatures Using a Blinded Cohort

Next we applied the predictive models for  $CHD7^{LOF}$  and  $KMT2D^{LOF}$  DNAm classification signatures in a blinded fashion to a cohort of individuals with either  $CHD7$  or  $KMT2D$  mutations classified as pathogenic, likely pathogenic or variants of unknown significance (VUS; Validation Cohort). After the prediction scores were generated, the mutation classification was unblinded for comparison to the reported variant classification (Figure 3). The  $CHD7^{LOF}$  DNAm signature predictive model generated high scores for all of the  $CHD7$  mutation samples ( $n = 20$ ) that were classified as pathogenic or likely pathogenic. The

same was true of the  $KMT2D^{LOF}$  model ( $n = 8$ ). Thus, both predictive models demonstrated the ability to correctly classify pathogenic mutations in their respective genes,  $CHD7$  or  $KMT2D$  (100% sensitivity), while giving low scores to samples with mutations in the other gene and to all controls in the Validation Cohort (100% specificity).

The Validation Cohort included one individual with a mutation in  $KDM6A$ , a second gene in which mutations are associated with Kabuki syndrome.<sup>34</sup> Interestingly, the  $KDM6A$  mutation received a high score from the  $KMT2D^{LOF}$  DNAm classification signature model, indicating that it is more similar to  $KMT2D^{LOF}$  than controls or  $CHD7^{LOF}$ .

#### Analysis of Sequence Variants in $CHD7$ and $KMT2D$ Using Gene-Specific DNAm Classification Signatures

The predictive models were next applied to cohorts of individuals with  $CHD7$  and  $KMT2D$  sequence variants of uncertain significance (VUS) that included missense and splice site mutations (Figure 4; Tables S1 and S2). Phenotypic information for these individuals is summarized in Tables S3 and S4. Of 13 individuals with VUS in  $CHD7$ , 6 clustered with the  $CHD7^{LOF}$  Discovery Cohort,

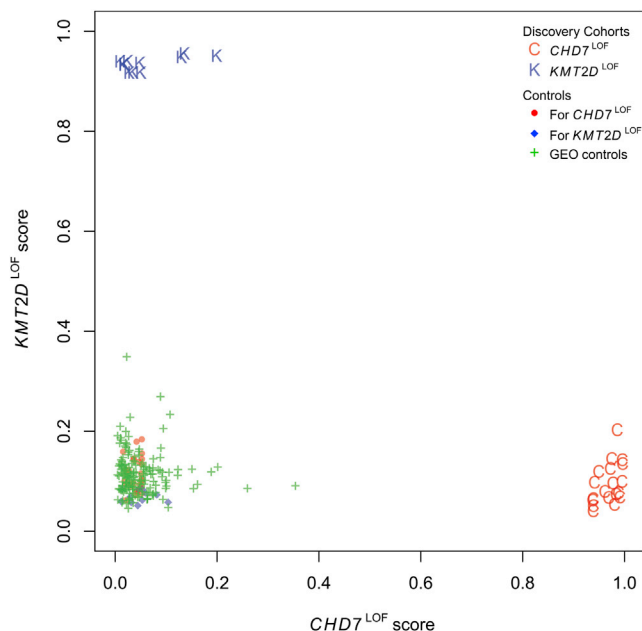

**Figure 2. Specificity of the *CHD7*<sup>LOF</sup> and *KMT2D*<sup>LOF</sup> DNAm Classification Signatures**

The plot shows the predictions for all samples from the original Discovery Cohorts, as well as for 162 normal blood samples extracted from the GEO repository. The x axis shows the predictive scores generated from the *CHD7*<sup>LOF</sup>-specific predictive model derived using the *CHD7*<sup>LOF</sup> individuals and matching controls. The y axis shows the predictive score of the *KMT2D*<sup>LOF</sup>-specific predictive model derived using the *KMT2D*<sup>LOF</sup> individuals and matching controls. Importantly, using the *KMT2D*<sup>LOF</sup>-specific model all 19 *CHD7*<sup>LOF</sup> (red C) received low scores, along with all *CHD7*<sup>LOF</sup> matching controls (red circles) and all GEO samples (green crosses). Similarly, using the *CHD7*<sup>LOF</sup>-specific model all 11 *KMT2D*<sup>LOF</sup> (blue K) received low scores, along with all *KMT2D*<sup>LOF</sup> matching controls (blue diamonds) and all GEO samples (green crosses).

suggesting that these variants (CHD7-20, 21, 23, 24, 25, and 30) are pathogenic, and 7 clustered with the control samples suggesting that these variants (CHD7-22, 26, 27, 28, 29, 31, and 32) are benign (Figure 4). The 6 variants predicted to be pathogenic included 2 splice site mutations (one inherited and one de novo) and 4 missense mutations (3 de novo, one inheritance unknown). The inherited splice site mutation was identified in a parent with no overt clinical manifestations of CHARGE syndrome. The parent had a normal ophthalmology exam and did not have a history of hearing loss, but did not undergo imaging of the middle/inner ear. All of the 7 variants predicted to be benign are inherited missense mutations. Of the 10 individuals with VUS in *KMT2D*, 1 clustered with the *KMT2D*<sup>LOF</sup> Discovery Cohort (KMT2D-12), suggesting that this variant is pathogenic and 8 clustered with the control samples suggesting that these variants (KMT2D-13, 15, 16, 17, 18, 19, 20, and 21) are benign. The KMT2D-14 variant had an intermediate score between the *KMT2D*<sup>LOF</sup> Discovery Cohort and the control samples. The KMT2D-12 variant predicted to be pathogenic is a de novo missense mutation. The KMT2D-14 variant with

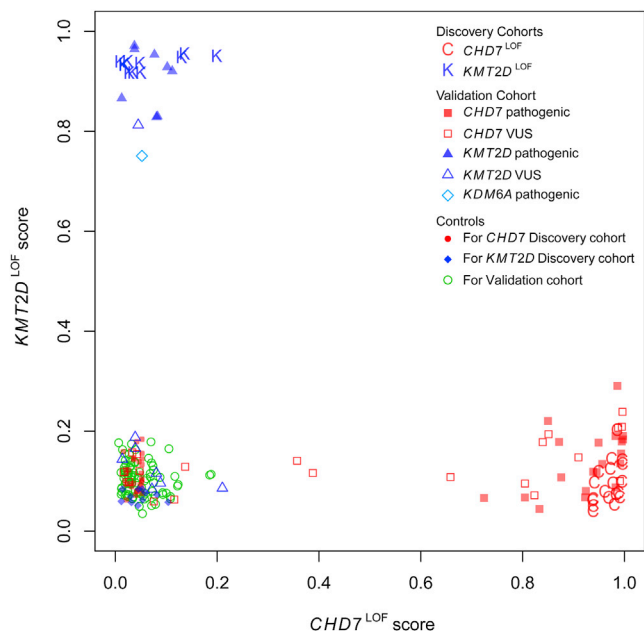

**Figure 3. Validation of *CHD7*<sup>LOF</sup> and *KMT2D*<sup>LOF</sup> DNAm Classification Signatures on a Blinded Cohort**

We derived the scores for each sample using the two predictive models built for the *CHD7*<sup>LOF</sup> and *KMT2D*<sup>LOF</sup> DNAm classification signatures (x axis and y axis, respectively; see Figure 2), for a validation set of DNAm samples. This set included both pathogenic mutations and VUS in *CHD7* (red squares), *KMT2D* (blue triangles) and *KDM6A* (turquoise diamond). The mutation and their pathogenicity were initially blinded and were revealed only after the prediction scores were determined. Importantly, all *CHD7* mutations received low scores by the *KMT2D*-specific predictive model, and vice versa. Pathogenic mutations in *CHD7* (filled red squares) received high scores from the *CHD7*<sup>LOF</sup> model, and pathogenic mutations in *KMT2D* (filled blue triangles) received very high scores from the *KMT2D*<sup>LOF</sup> model. Interestingly, a pathogenic mutation in the Kabuki-associated gene *KDM6A* also received a very high score from the *KMT2D*<sup>LOF</sup> model, indicating a potential methylation-signature overlap between these two genes.

the intermediate score is a de novo splice site mutation. The 8 variants predicted to be benign are all inherited missense mutations.

### Diagnostic Classification by DNAm Signature versus Clinical Criteria

A comparison of the *CHD7*<sup>LOF</sup> DNAm classification signature prediction (pathogenic or benign) to the Verloes<sup>17</sup> diagnostic criteria for CHARGE syndrome and that recently proposed by Hale<sup>18</sup> revealed discordant results for four individuals within our *CHD7* variant cohort (Table 1). Specifically, three individuals who did not meet criteria for a diagnosis of CHARGE using either the Verloes or Hale criteria (CHD7-20, CHD7-21, and CHD7-30) were determined to have pathogenic *CHD7* mutations when classified utilizing the *CHD7*<sup>LOF</sup> DNAm classification signature. Of note, individual CHD7-21 did not have sufficient clinical information to be classified using the Hale criteria. All three of these mutations were de novo. The fourth individual (CHD7-22) was classified as “partial” CHARGE using the Verloes criteria

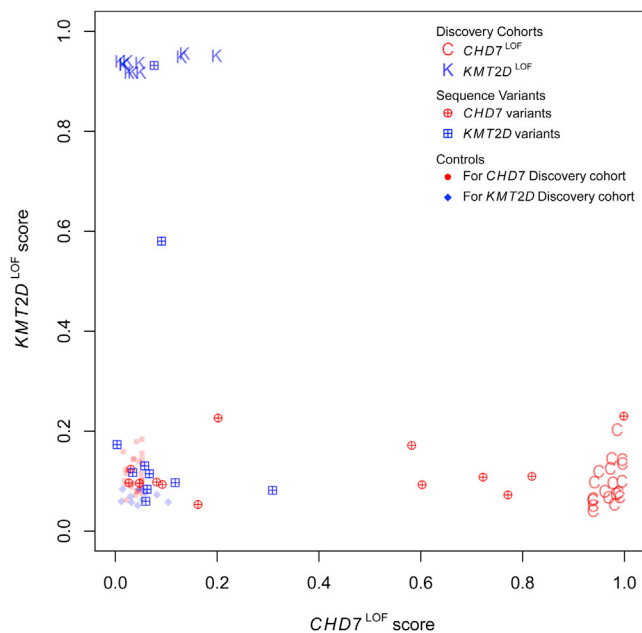

**Figure 4. Sequence Variants in *CHD7* and *KMT2D* Sorted Using the *CHD7*<sup>LOF</sup> and *KMT2D*<sup>LOF</sup> DNAm Classification Signatures**

We derived the scores for each individual using the two models generated for *CHD7*<sup>LOF</sup> and *KMT2D*<sup>LOF</sup> DNAm classification signatures (x axis and y axis, respectively; see Figure 2), for a set of 13 mutation variants in *CHD7* (red crossed circles) and 10 mutation variants in *KMT2D* (blue crossed squares). The details of the sample classification are shown in Tables 1 and 2.

and met a clinical diagnosis for CHARGE using the Hale criteria but the *CHD7*<sup>LOF</sup> DNAm classification signature predicted this to be a benign *CHD7* variant. This variant was an inherited synonymous mutation.

Comparison of the *CHD7*<sup>LOF</sup> DNAm classification signature predictions to independent in silico prediction algorithms, specifically PolyPhen-2<sup>12</sup>, SIFT,<sup>13</sup> Mutation Taster,<sup>14</sup> and ESE finder<sup>15,16</sup> also revealed discordant results for 5 individuals with missense mutations (CHD7-26, CHD7-27, CHD7-28, CHD7-29, and CHD7-32). Specifically, 5 results were discordant with Mutation Taster, 4 results were discordant with SIFT and 1 result was discordant with PolyPhen-2. However, none of these predictive algorithms were in complete agreement with each other.

Consensus clinical diagnostic criteria for Kabuki syndrome have not been established. Individuals with this condition have characteristic facial features, in addition to a variety of congenital anomalies (intellectual disability, short stature, persistent fingertip pads, and skeletal anomalies), which suggest the diagnosis. Individual KMT2D-12 who clustered with the *KMT2D*<sup>LOF</sup> Discovery Cohort when the *KMT2D*<sup>LOF</sup> DNAm classification signature was applied had a clinical diagnosis of Kabuki syndrome (established by O.C.; Table 2). Individual KMT2D-14 who had an intermediate score between the *KMT2D*<sup>LOF</sup> Discovery Cohort and the control samples also had a clinical diagnosis of Kabuki syndrome (established by R.M.-L.). Notably, both individuals had typical facial features in addition to other characteristic clinical features.

### Genes with Differential DNAm in the *CHD7*<sup>LOF</sup> and *KMT2D*<sup>LOF</sup> DNAm Signatures

The majority of CpG sites differentially methylated for *CHD7*<sup>LOF</sup> and *KMT2D*<sup>LOF</sup> were specific to each DNAm signature. The *CHD7*<sup>LOF</sup> CpG sites were located within the bodies or promoter regions (up to 1500 bp upstream of the transcription start site) of 86 known RefSeq genes (Table S8).<sup>35</sup> Several genes demonstrated differential DNAm at multiple probes, including *FOXP2*, *HOXA* transcript antisense RNA, myeloid-specific 1 (*HOTAIRM1*), homeobox A1 (*HOXA1* [MIM: 142955]), homeobox A6 (*HOXA6* [MIM: 142951]), *HOXA5* and *SLITRK5*. Analysis of differentially methylated regions, using bump hunting,<sup>27</sup> detected consistent patterns of DNAm gain or loss in the vicinity of these genes (Table S10). Enrichment analysis of the probes within the *CHD7*<sup>LOF</sup> DNAm signature confirmed a statistically significant over-representation in GO Biological Process<sup>31</sup> categories related to growth and embryonic development of the brain, ear, digestive, endocrine, and neural systems, as well as additional functional categories that are highly relevant to the phenotypic features associated with CHARGE syndrome (Table S12).

The *KMT2D*<sup>LOF</sup> CpG sites were located within the bodies or promoter regions of 105 known genes (Table S9). Among these, multiple CpG sites mapped to *HOTAIRM1*, homeobox A4 (*HOXA4* [MIM: 142953]), *HOXA5*, and *SLITRK5*. These genes were also identified as corresponding to *KMT2D*<sup>LOF</sup> associated differentially methylated regions detected by bump hunting (Table S11). Enrichment analysis of the probes within the *KMT2D*<sup>LOF</sup> DNAm signature confirmed a statistically significant over-representation in GO biological processes related to skeletal, lung and digestive system development; as well there were functional categories similar to those observed for the *CHD7*<sup>LOF</sup> signature including pattern specification and embryonic morphogenesis (Table S13).

Due to the presence of both overlapping and clinically distinct features seen in CHARGE and Kabuki syndromes, we examined the *CHD7*<sup>LOF</sup> and *KMT2D*<sup>LOF</sup> DNAm signatures for both shared and distinct CpG targets. There were 14 CpG sites shared by the *CHD7*<sup>LOF</sup> and *KMT2D*<sup>LOF</sup> DNAm signatures: 11 corresponding to *HOXA5* and 3 to *SLITRK5*. The *HOXA5* CpGs demonstrated a gain of DNAm in both the *CHD7*<sup>LOF</sup> and *KMT2D*<sup>LOF</sup> signatures. DNAm was validated using sodium bisulfite pyrosequencing for 3 CpG sites in the *HOXA5* promoter (cg01370449, cg04863892, and cg19759481; Figures 5A–5C). The average gain of DNAm for the three sites is *CHD7*<sup>LOF</sup> was 18%, 20%, and 20% respectively, compared to 18%, 18%, and 19% for *KMT2D*<sup>LOF</sup>. Furthermore, the analysis of DMRs for *CHD7*<sup>LOF</sup> and *KMT2D*<sup>LOF</sup> using bump hunting also confirmed gain of DNAm at overlapping DMRs in the vicinity of *HOXA5* (Figure S4A). The shared CpG sites near *SLITRK5* demonstrated DNAm changes in opposite directions in the two signatures, with a loss of DNAm

**Table 1. Classification of CHD7 Sequence Variants Utilizing DNAm Signatures, Clinical Criteria and In Silico Prediction Algorithms**

| Sample ID | Mutation             | Protein Change     | Inheritance  | Signature (positive/negative) | Verloes criteria (2005) | Hale proposed criteria (2015) | SIFT (score)       | Mutation Taster (p value) | PolyPhen-2 prediction effect (score) |
|-----------|----------------------|--------------------|--------------|-------------------------------|-------------------------|-------------------------------|--------------------|---------------------------|--------------------------------------|
| CHD7-20   | c.6322G>T            | p.Gly2108Trp       | de novo      | positive                      | N                       | N*                            | Deleterious (0)    | Disease Causing (1)       | Probably Damaging (1)                |
| CHD7-21   | c.3746G>A            | p.Arg1249Gln       | de novo      | positive                      | N                       | I                             | Deleterious (0)    | Disease Causing (1)       | Probably Damaging (1)                |
| CHD7-22   | c2751G>A             | p. Thr917 =        | inherited    | negative                      | P                       | Y                             | ND                 | ND                        | ND                                   |
| CHD7-23   | c.-15G>A             | ND <sup>a</sup>    | inherited    | positive                      | A                       | Y                             | ND                 | ND                        | ND                                   |
| CHD7-24   | c.4225G>A            | p.Val1409Met       | not maternal | positive                      | P                       | Y                             | Deleterious (0)    | Disease Causing (1)       | Probably Damaging (0.997)            |
| CHD7-25   | c.5436C>G            | p.Asp1812Glu       | de novo      | positive                      | I                       | I                             | Deleterious (0)    | Disease Causing (1)       | Probably Damaging (1)                |
| CHD7-26   | c.5633A>G            | p.Asp1878Gly       | inherited    | negative                      | I                       | I                             | Deleterious (0.01) | Disease Causing (1)       | Benign (0.394)                       |
| CHD7-27   | c.5848G>A            | p.Ala1950Thr       | inherited    | negative                      | I                       | I                             | Deleterious (0)    | Disease Causing (1)       | Benign (0.057)                       |
| CHD7-28   | c.6304G>T            | p.Val2102Phe       | inherited    | negative                      | I                       | I                             | Deleterious (0.05) | Disease Causing (0.969)   | Benign (0.389)                       |
| CHD7-29   | c.3566G>A            | p.Arg1189His       | inherited    | negative                      | I                       | I                             | Deleterious (0)    | Disease Causing (1)       | Probably Damaging (1)                |
| CHD7-30   | c2238+1del           | ND <sup>b</sup>    | de novo      | positive                      | N                       | N*                            | ND                 | ND                        | ND                                   |
| CHD7-31   | c.2049_2050insAAAGCA | p.Ala685_Lys686dup | inherited    | negative                      | I                       | I                             | ND                 | ND                        | ND                                   |
| CHD7-32   | c.6377A>T            | p.Asp2126Val       | inherited    | negative                      | N                       | N                             | Tolerated (0.13)   | Disease Causing (1)       | Benign (0.014)                       |

CHARGE Criteria Legend: N, does not meet criteria; p, partial CHARGE; A, atypical CHARGE; Y, meets criteria; I, insufficient information to classify; N\*, meets criteria if variant considered pathogenic; ND, not determined.

<sup>a</sup>ESEfinder Splicing Prediction for CHD7-23 identifies loss of a SF2/ASF site.

<sup>b</sup>ESEfinder Splicing Prediction for CHD7-30 identifies a gain of a SC35 site.

in *CHD7*<sup>LOF</sup> but gain of DNAm in *KMT2D*<sup>LOF</sup>. For *SLITRK5*, 3 CpG sites (cg16787483, cg24626752, and cg09823859; Figures 5D–5F) were validated using pyrosequencing. An average loss of DNAm of 20%, 14%, and 12% in the *CHD7*<sup>LOF</sup> samples was confirmed, whereas an average gain of DNAm of 21%, 24%, and 24% was confirmed in *KMT2D*<sup>LOF</sup> samples. This finding was confirmed by bump hunting in the overlapping DMRs (Figure S4B).

DNAm was also validated for CpG sites in genes specific to each DNAm signature. For the *CHD7*<sup>LOF</sup> DNAm signature two CpG sites in *FOXP2* (cg18546840 and cg18871253) were selected because of the critical role of *FOXP2* in brain and craniofacial development.<sup>36,37</sup> Both of these CpG sites exhibit an average loss of DNAm of 15% (Figures 5G and 5H). For the *KMT2D*<sup>LOF</sup> DNAm signature a CpG site in *MYO1F* (cg15254671) with an average 33% loss of DNAm (Figure 5I) was validated. This CpG site, along with four others in the same CpG island (spanning exon 23 to 24), carry chromatin marks classified as a promoter or enhancer in different cell types.<sup>38,39</sup>

## Discussion

We have identified two unique DNAm signatures associated with loss of function mutations in *CHD7* (*CHD7*<sup>LOF</sup>) and *KMT2D* (*KMT2D*<sup>LOF</sup>), further enhancing our understanding of the critical role of epigenetic dysregulation in neurodevelopmental disorders. These two gene-specific signatures demonstrate 100% specificity and 100% sensitivity, enabling differentiation between pathogenic and benign mutations in *CHD7* and *KMT2D*, respectively. That is, these DNAm signatures can function as tools to classify variants of unknown significance (VUS) in these genes. Interestingly, comparisons of the differentially methylated sites within the *CHD7*<sup>LOF</sup> and *KMT2D*<sup>LOF</sup> DNAm signatures provide evidence that *CHD7* and *KMT2D* regulate common biological pathways likely reflecting the clinical overlap between CHARGE and Kabuki syndromes.

### Functional Roles of CHD7 and KMT2D

Mutations in *CHD7* were initially identified as the etiology of CHARGE syndrome in 2004.<sup>1</sup> Since that time, much has



**Table 2. Classification of *KMT2D* Sequence Variants Utilizing DNAm Signatures and In Silico Prediction Algorithms**

| Sample ID | Mutation               | Protein change  | Inheritance | Signature (positive/negative) | SIFT (score)       | Mutation Taster (p value) | PolyPhen-2 prediction effect (score) |
|-----------|------------------------|-----------------|-------------|-------------------------------|--------------------|---------------------------|--------------------------------------|
| KMT2D-12  | c.15143G>A             | p.Arg5048His    | de novo     | positive                      | Deleterious (0)    | Disease Causing (1)       | Probably Damaging (1)                |
| KMT2D-13  | c.12028T>C             | p.Ser4010Pro    | inherited   | negative                      | Tolerated (0.28)   | Polymorphism (1)          | Benign (0.001)                       |
| KMT2D-14  | c.16522-5_16522-4delTT | ND <sup>a</sup> | de novo     | positive                      | ND                 | ND                        | ND                                   |
| KMT2D-15  | c.15910A>G             | p.Ile5304Val    | inherited   | negative                      | Tolerated (0.06)   | Disease Causing (1)       | Probably Damaging (0.997)            |
| KMT2D-16  | c.15659G>A             | p.Arg5220His    | inherited   | negative                      | Deleterious (0.01) | Disease Causing (1)       | Probably Damaging (1)                |
| KMT2D-17  | c.10256A>G             | p.Asp3419Gly    | inherited   | negative                      | Tolerated (0.2)    | Disease Causing (1)       | Probably Damaging (1)                |
| KMT2D-18  | c.8974G>A              | p.Glu2992Lys    | inherited   | negative                      | Tolerated (0.08)   | Disease Causing (1)       | Probably Damaging (0.0996)           |
| KMT2D-19  | c.8831A>G              | p.Asn2944Ser    | inherited   | negative                      | Tolerated (0.27)   | Polymorphism (1)          | Benign (0.013)                       |
| KMT2D-20  | c.832G>A               | p.Ala278Thr     | inherited   | negative                      | Tolerated (0.53)   | Polymorphism (0.98)       | Benign (0)                           |
| KMT2D-21  | c.682C>G               | p.Arg228Gly     | inherited   | negative                      | Deleterious (0.02) | Polymorphism (0.883)      | Benign (0.36)                        |

ND = not determined

<sup>a</sup>ESEfinder Splicing Prediction for KMT2D-14 identifies loss of a SF2/ASF site.

been learned regarding the biological function of this gene. CHD7, an ATP-dependent chromodomain helicase chromatin remodeling protein is involved in the formation of several large protein complexes that regulate the movement of nucleosomes along DNA, and as such affects the activity of numerous signaling pathways during embryonic development.<sup>40</sup> These CHD7-containing protein complexes bind to DNA at specific sites, the majority of which overlap with regulatory elements such as gene promoters or enhancers.<sup>41,42</sup> The epigenetic effects of CHD7 on chromatin and gene regulation appear to vary both temporally and spatially, depending largely upon the function of the protein complex with which it interacts (for review see<sup>43</sup>). *CHD7* is expressed in embryonic stem cells; its expression becomes restricted to specific tissues, including the brain, eye, heart, and ear, during differentiation.<sup>44</sup> Gene-expression studies in mouse embryos carrying a homozygous deletion of *Chd7* demonstrate significant expression differences in many genes important for brain development.<sup>45</sup>

Mutations in *KMT2D* were initially identified as the major cause of Kabuki syndrome in 2010.<sup>2</sup> *KMT2D*, a lysine methyltransferase, adds a tri-methyl mark to histone 3 lysine 4 (H3K4), which promotes gene expression by facilitating open chromatin conformation.<sup>46</sup> *KMT2D* belongs to the family of mixed-lineage leukemia (MLL) genes, which are involved in controlling other genes essential for embryogenesis, including the *HOX* genes.<sup>47,48</sup> In a mouse model of Kabuki syndrome, heterozygous disruption of *Kmt2d* is associated with a genome-wide reduction of H3K4 tri-methylation.<sup>49</sup> Histone methylation patterns in cardiac tissue from embryos with homozygous deletions of *Kmt2d* show a global decrease in H3K4 mono- and dimethylation, when compared to controls, suggesting that *KMT2D* functions at both enhancers and gene promoters to regulate gene expression.<sup>47</sup>

### Utility of *CHD7*<sup>LOF</sup> and *KMT2D*<sup>LOF</sup> DNAm Signatures

Diagnosis of CHARGE and Kabuki syndromes in the clinical setting can be challenging. CHARGE syndrome in particular has been shown to have extensive intra- and interfamilial clinical variability.<sup>50,51</sup> Since the first description of CHARGE syndrome in 1981, diagnostic criteria for this condition have undergone several iterations, reflecting a broadening of the phenotype.<sup>17,18,52,53</sup> The challenges in establishing a clinical diagnosis of CHARGE syndrome using existing diagnostic criteria (Table 1) are highlighted by data for four individuals in the current study, that demonstrate incongruities between the criteria-based clinical classifications of CHARGE syndrome and our *CHD7*<sup>LOF</sup> DNAm classification signature predictions. Specifically, three individuals who did not meet clinical criteria for a diagnosis of CHARGE syndrome were identified to have the DNAm signature (predicting pathogenicity) and one individual who did meet clinical criteria for a diagnosis of CHARGE syndrome did not have the DNAm signature (predicting a benign variant). Existing in silico prediction tools often provide different and contradictory results as seen for several of the individuals in our *CHD7* variant cohort.<sup>54</sup> We propose that our *CHD7*<sup>LOF</sup> DNAm classification signature could be used as a functional molecular test to aid in the interpretation of the pathogenicity of *CHD7* sequence variants, providing a valuable tool to facilitate in the diagnosis of CHARGE syndrome.

Similarly, the *KMT2D*<sup>LOF</sup> DNAm classification signature could be used to assess the pathogenicity of *KMT2D* sequence variants (Table 2). For example, in the case of the two individuals with *KMT2D* VUS, the DNAm classification signature provided functional molecular validation for a suspected clinical diagnosis when sequence analysis did not provide a definitive answer.

For individuals reported to have putative pathogenic variants in *CHD7*, 17% do not fulfill diagnostic criteria

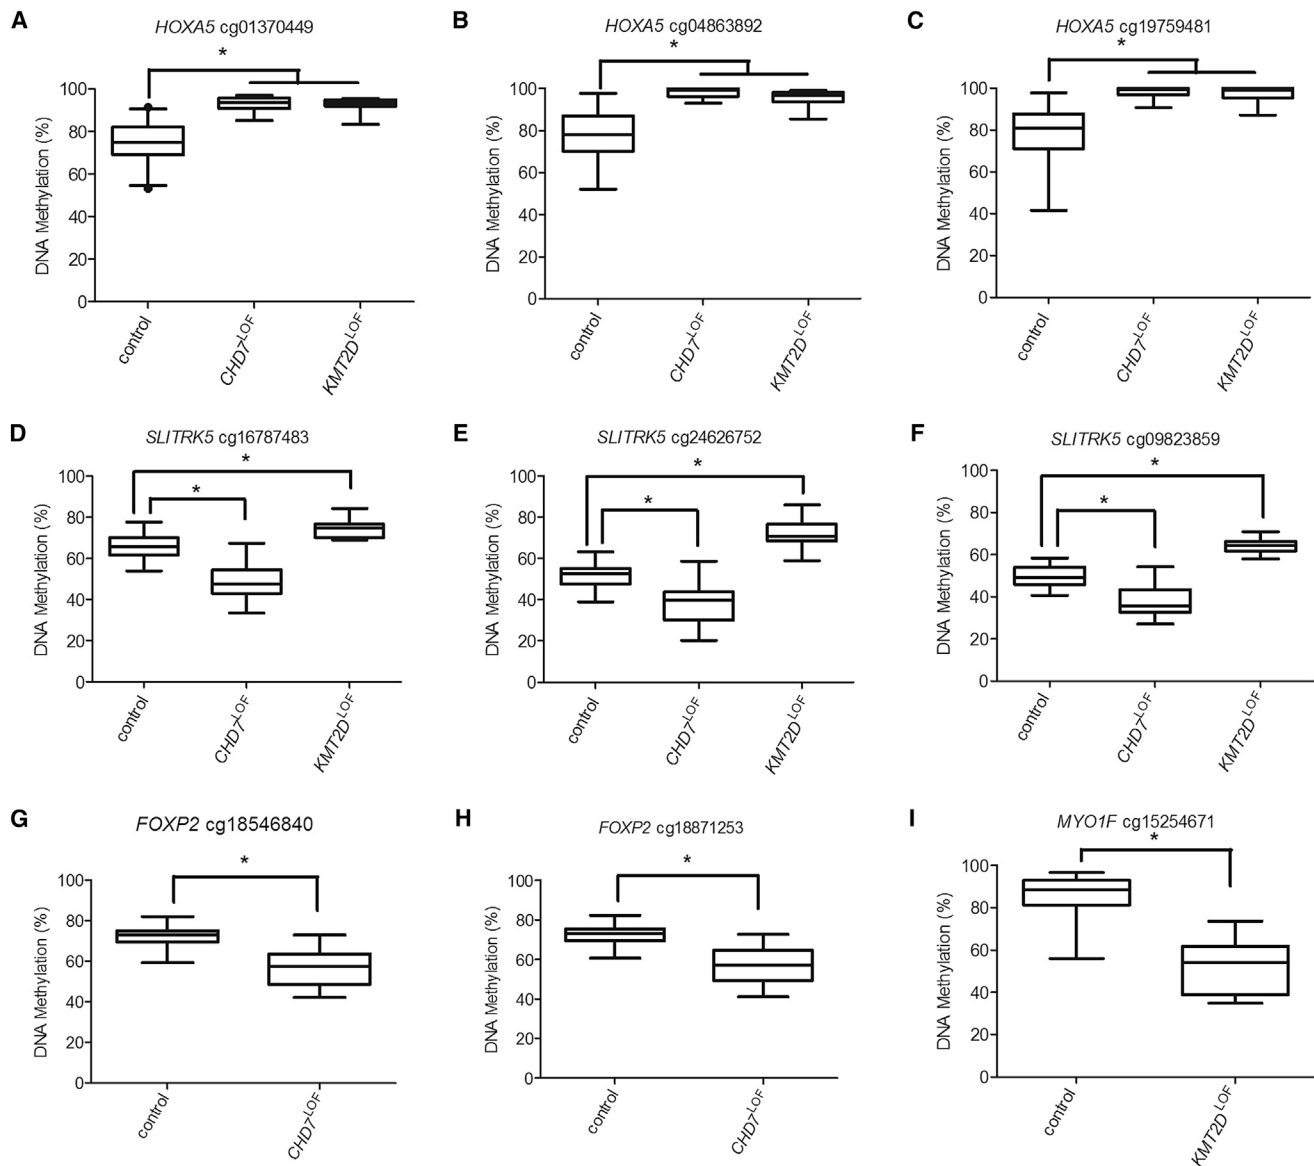

**Figure 5. Targeted Sodium Bisulfite Pyrosequencing Validation of DNAm Alterations in *CHD7* and *KMT2D* Discovery Cohorts**

(A–C) DNAm was assessed for three CpG sites in the promoter of *HOXA5* (cg01370449, cg04863892, and cg19759481). The gain of DNAm for the three sites in *CHD7*<sup>LOF</sup>: 18%, 20%, and 20%. For *KMT2D*<sup>LOF</sup> there was also a gain of DNAm: 18%, 18%, and 19%, respectively. Both the *CHD7*<sup>LOF</sup> and *KMT2D*<sup>LOF</sup> group are statistically different from the controls for all three probes, but not from each other. (D–F) DNAm was assessed for three CpG sites in the gene body of *SLITRK5* (cg16787483, cg24626752, and cg09823859). A loss of DNAm of 20%, 14%, and 12% in the *CHD7*<sup>LOF</sup> samples and a gain of DNAm of 21%, 24%, and 24% in *KMT2D*<sup>LOF</sup> samples are shown. Both the *CHD7*<sup>LOF</sup> and *KMT2D*<sup>LOF</sup> group are statistically different from the controls for all three probes, and from each other.

(G and H) DNAm was analyzed for *FOXP2* (cg18546840 and cg18871253) in *CHD7*<sup>LOF</sup>, which had a 15% loss of DNAm compared to controls.

(I) DNAm was analyzed for *MYO1F* (cg15254671) in *KMT2D*<sup>LOF</sup>, which had a loss of DNAm of 33% compared to controls. Testing for a statistical difference between all groups was performed using a Kruskal-Wallis test; \**p* < 0.0001.

for CHARGE syndrome, further demonstrating the phenotypic variability and the imperfect alignment between clinical classification and molecular test data.<sup>55,56</sup> Further, although pathogenic mutations in *CHD7* are identified in 90% of individuals fulfilling Blake's criteria, only 65%–70% of individuals with typical or suspected CHARGE syndrome are identified to have a pathogenic *CHD7* mutation.<sup>55,57</sup> Similarly, only ~70% of individuals with a clinical diagnosis of Kabuki syndrome are identified to have

pathogenic mutations in *KMT2D* or *KDM6A*<sup>58</sup>. It is not clear whether the missing 30% of mutations occur in promoters or enhancers not identified by current sequencing techniques or if there might be locus heterogeneity. The *CHD7*<sup>LOF</sup> and *KMT2D*<sup>LOF</sup> DNAm signatures could provide a means of enhancing the molecular diagnostic rates for these syndromes, because they could detect loss of function mutations that might not be detected by current sequence-based testing. In future, further validation of

the clinical utility of these signatures could be derived from RNA sequence-based functional assays.

The utility of DNAm signatures for the epigenes *CHD7* and *KMT2D* constitute a generalization of our previous work with epigenes, in which we demonstrated the utility of a DNAm signature in classifying VUS in *NSD1* associated with Sotos syndrome.<sup>8</sup> The *NSD1*-specific DNAm signature also enabled molecular distinction between Sotos syndrome and the clinically overlapping overgrowth condition Weaver syndrome [MIM: 277590] resulting from mutations in enhancer of zeste, *Drosophila*, homolog 2 (*EZH2* [MIM: 601573]), another epigene encoding a histone methyltransferase.<sup>59,60</sup>

### Overlapping Molecular Mechanisms for CHARGE and Kabuki Syndromes

Clinical overlap between CHARGE and Kabuki syndromes was initially reported by Ming et al. (2003) over 10 years ago.<sup>3</sup> Since then, several reports have demonstrated the difficulty in distinguishing between these two conditions, especially in infancy when the typical facial gestalt of Kabuki syndrome might not yet be apparent.<sup>4,61,62</sup> Overlapping clinical features include postnatal growth retardation, cleft lip/palate, hearing loss, congenital heart defects, urogenital malformations, developmental delay, and intellectual disability. As well, ocular coloboma, which is a major diagnostic criterion for CHARGE syndrome, has occasionally been reported in individuals with Kabuki syndrome.<sup>4,61,62</sup> The genes associated with CHARGE (*CHD7*) and Kabuki (*KMT2D* and *KDM6A*) syndromes all play a role in chromatin remodeling. Evidence supporting a functional connection between *CHD7* and *KMT2D* comes from studies showing that both these protein interact with members of the WAR complex (WDR5, RBBP5, and ASH2L).<sup>6,7,63</sup> On the basis of these findings, it was suggested that *CHD7* and *KMT2D* regulate a common subset of genes.<sup>7</sup> Our finding that the unique *CHD7*<sup>LOF</sup> and *KMT2D*<sup>LOF</sup> DNAm signatures have common CpG targets, specifically within *HOXA5* and *SLITRK5*, provides additional evidence for molecular mechanistic connections between CHARGE and Kabuki syndromes and also provides important functional data to explain the pathophysiologic basis of the overlapping features in these two conditions.

Our previous work on *NSD1* demonstrated the relevance of the DNAm targets in blood to our understanding of the pathophysiology of the disease. In the case of *NSD1* loss of function mutations, DNAm gene targets were enriched for neural and cellular development pathways, reflecting the cardinal features of Sotos syndrome (overgrowth and developmental delay).<sup>8</sup> Our finding that the *CHD7* and *KMT2D* DNAm targets appear to relate to genes involved in the embryonic development of cell types and tissues demonstrating malformations in CHARGE and Kabuki syndromes further supports the functional significance of these DNAm signatures and provides valuable data relevant to the pathophysiology of these conditions.

Both *CHD7* and *KMT2D* have been previously linked to expression of various homeobox-containing genes. The homeobox (*HOX*) genes encode highly conserved transcription factors that are expressed in a spatially and temporally regulated manner during development.<sup>64</sup> *HOX* expression during development is tightly regulated in part by chromatin structure and epigenetic modifications, including DNAm.<sup>65</sup> In the mouse, the developing neural tube of *Chd7*<sup>-/-</sup> embryos also showed altered expression of other homeobox genes, such as orthodenticle homeobox 2 (*Otx2*) and gastrulation brain homeobox 2 (*Gbx2*).<sup>66</sup> Chromatin immunoprecipitation assays have shown that *CHD7* binds to other chromatin-associated proteins at genomic sites within the *HOXA1*, *HOXA5*, and *HOXA6*.<sup>41</sup> In fibroblast cells from individuals with loss of function *KMT2D* mutations, targeted expression analysis of homeobox C6 (*HOXC6* [MIM: 142972]) showed a decreased transcript level compared to controls.<sup>67</sup> *KMT2D* has also been shown to bind to DNA in the *HoxA* cluster in mouse embryonic-stem-cell-derived cardiomyocytes.<sup>47</sup>

The finding that *HOXA5* is regulated by both *CHD7* and *KMT2D* provides us with further clues to the pathophysiology of CHARGE and Kabuki syndromes. In both the *CHD7*<sup>LOF</sup> and *KMT2D*<sup>LOF</sup> DNAm signatures, a gain in DNAm was observed at the *HOXA5* promoter. Functional studies in a wide range of vertebrate species have established the conserved roles of *HOX* genes as transcription factors that regulate axial patterning of the developing embryo.<sup>68</sup> A study of the mouse promoter *HoxA5* showed that it is unmethylated in specific embryonic tissues, including liver, intestine, and spleen.<sup>69</sup> In those same tissues postnatally, the *HoxA5* promoter becomes completely (spleen), or partially (intestine) unmethylated, or remains unmethylated (liver). Therefore, DNAm appears to be a crucial element in the developmental regulation of *Hox* activity postnatally. Our findings of a 20% increase in DNAm is likely to be functionally relevant given data from a mouse model wherein a high-fat diet is associated with a 25% increase in DNA methylation of the *Hoxa5* promoter in adipose tissue resulting in a significant reduction in mRNA and protein expression of this gene.<sup>70</sup>

Some of the clinical features shared by CHARGE and Kabuki syndromes could be mediated by reduced expression of *HOXA5*. Based on functional studies of *HOXA5* in mice, we propose that these could include growth deficiency, skeletal and limb anomalies, renal dysgenesis, and neural development.<sup>71–75</sup> In one mouse model with heterozygote *Hoxa5* truncating mutations, the mutant mice were phenotypically indistinguishable from their wild-type littermates but on further evaluation of skeletal morphology, an increased rate of rib anomalies/vertebral defect were identified.<sup>76</sup> Of interest, individuals with CHARGE and Kabuki syndromes demonstrate vertebral anomalies and individuals with CHARGE syndrome can have missing ribs.<sup>77</sup> Additional studies focused on the

brain and behavior of these mice could demonstrate important changes in brain function and/or behavior given a recent report characterizing the expression profile and the neuroanatomical localization of *HOXA5* in the fetal, postnatal, and adult brain.<sup>75</sup> They identified *Hoxa5* transcripts in the medulla oblongata and the pons from fetal to adult stages, and in the thalamus and the cortex from postnatal stages through adulthood. They also demonstrated that *Hoxa5* is transcribed in the adult cerebellum and that the *HOXA5* protein is present in all the *Hoxa5*-expressing hindbrain nuclei in adulthood. This suggests that *HOXA5* in these nuclei might be required for processes beyond the early developmental patterning and neuronal migration phases, including axonal growth and synapse formation during circuit establishment, refinement of neural circuits during early postnatal life in response to environmental cues, or adult synaptic plasticity.<sup>75</sup> Interestingly, in each of the DNAm signatures there are multiple *HOXA* genes that have differential DNAm, including *HOTAIRM*, *HOXA1*, and *HOXA6* in *CHD7*<sup>LOF</sup> and *HOXA4* in *KMT2D*<sup>LOF</sup>.

*HOTAIRM* is a long non-coding RNA (lncRNA), which has been found to interact with different chromatin-modifying complexes.<sup>78</sup> Recent work by Wang and Dostie (2016) found that *HOTAIRM1* contributes to three-dimensional changes in chromatin organization required for the temporal collinear activation of *HOXA* genes.<sup>79</sup> Their findings also demonstrate that lncRNAs derived from the *HOTAIRM1* gene can activate and/or repress *HOXA* gene expression in different cell types. Our finding that *CHD7*<sup>LOF</sup> is associated with differential DNAm at *HOTAIRM* suggests multiple layers of epigenetic dysregulation impacting cell-type-specific *HOXA* gene expression in CHARGE syndrome. *HOTAIRM1* is also known to modulate  $\beta$ -integrin signaling, which has been shown to be critical for the expansion of neural stem cells in the development of the cerebral cortex of model organisms.<sup>80,81</sup> These data suggest specific pathophysiologic mechanisms that could account for neurodevelopmental anomalies in CHARGE syndrome.

A second gene, *SLITRK5*, also had shared differentially methylated CpG sites in the gene body and surrounding shores in each of the DNAm signatures with a loss of DNAm in *CHD7*<sup>LOF</sup> and a gain of DNAm in *KMT2D*<sup>LOF</sup>. The *SLITRK* family encodes transmembrane proteins which function at synapses<sup>82,83</sup>. *SLITRK5* has been shown to function in synaptic adhesion and in tropomyosin receptor kinase B (TRKB) signaling upon brain-derived neurotrophic factor (BDNF) stimulation.<sup>84</sup> In *Chd7*<sup>-/-</sup> mouse whole embryos, expression of *SLITRK5* is decreased.<sup>45</sup> Mice with homozygous deletion of *Slitrk5* develop an over-grooming phenotype and deficiencies in corticostriatal transmission as well as a reduction in glutamate receptor subunits.<sup>85</sup> We expect that dysregulation of *SLITRK5*, either gain or loss, could impact neuronal development due to its role in many tightly regulated processes at the synapse.

## Epigenetic Targets Specific to CHARGE and Kabuki Syndromes

One of the genes specific to the *CHD7*<sup>LOF</sup> DNAm signature is *FOXP2*. In mice, *FOXP2* has been shown to be expressed in the motor related circuitry in the brain, which controls craniofacial development including muscles of the face and striatal brain development.<sup>36,37</sup> In mouse embryonic stem cells and neural progenitors, chromatin immunoprecipitation assays show that *CHD7* binds to the *Foxp2* promoter.<sup>41</sup> As mutations in *FOXP2* have been identified in individuals with speech and language deficits,<sup>86</sup> it is possible that altered *FOXP2* expression might contribute to the speech and language difficulties in individuals with CHARGE syndrome.

Specific to the *KMT2D*<sup>LOF</sup> DNAm signature are CpG sites within the gene body of *MYO1F*. These sites are located in a CpG island carrying chromatin marks which classify the region as regulatory, specifically as a promoter or enhancer in different cell types.<sup>38,39</sup> This unconventional myosin is expressed in the inner ear and heterozygous missense mutations in this gene have been identified in individuals with hereditary hearing loss.<sup>87</sup>

## Overlapping Epigenetic Targets for KMT2D and KDM6A in Kabuki Syndrome

Our observation that the single sample from with a *KDM6A* pathogenic mutation in the Validation cohort clustered with the pathogenic *KMT2D* samples suggests that these two genes regulate overlapping sets of genes. This is in keeping with evidence from earlier studies that showed these two proteins share *HOX* targets.<sup>88</sup> *KDM6A*, a histone demethylase, has been shown to interact with *KMT2D* as part of a multi-protein complex.<sup>89</sup> More recently, the majority of *KDM6A* target genes have been shown to be co-regulated by *KMT2D*.<sup>90</sup> Knock-down of the zebrafish orthologs of *KMT2D* and *KDM6A* confirmed the role of these proteins in craniofacial, heart, and brain development, providing direct evidence of the overlapping, functional roles of these genes in the development of tissues and organs affected in Kabuki syndrome.<sup>91</sup> DNAm analysis of additional samples with *KDM6A* pathogenic mutations will be required to assess for potentially overlapping yet distinct DNAm signatures. Such a study would also allow for a comparison of the target genes regulated by *KMT2D* and *KDM6A* furthering our understanding of the overlapping and distinct functions of these two genes in the etiology of Kabuki syndrome.

## Potential for Therapeutic Interventions Based on Epigenetic Targets

As our knowledge of epigenetic regulation in neurodevelopmental disorders increases, so does the opportunity for therapeutic interventions. The potential positive impact of such interventions is heightened by compelling evidence for the potential to reverse *postnatally* neurological phenotypes in mouse models of Rett syndrome (*RTT* [MIM: 312750]) caused by mutations in

the epigenetic methyl-CpG binding protein 2 (*MECP2* [MIM: 300005]).<sup>92</sup> Recently, Bjornsson et al. (2014) showed that memory deficits in a mouse model of Kabuki syndrome (*Kmt2d*<sup>+/<sup>βGeo</sup>) can be prevented or even reversed through systemic delivery of a histone deacetylase (HDAC) inhibitor, which promotes open chromatin states.<sup>49</sup> Their findings provide support for the hypothesis that neurodevelopmental deficits in Kabuki syndrome are maintained by an impairment of adult neurogenesis because of an imbalance between open and closed chromatin states for critical target genes. We propose that *HOXA5* (regulated by both *CHD7* and *KMT2D*), which has recently been found to be transcribed in the adult brain might be one of these critical target genes.<sup>93</sup> A more general potential therapeutic role for HDAC inhibitors in neurodevelopmental syndromes caused by certain epigenetic is supported by the fact that these inhibitors have also been shown to reverse the long term memory deficit in mouse models of Rubinstein-Taybi syndrome (*RSTS1* [MIM: 180849]) caused by haploinsufficient mutations in another epigenetic, histone acetyltransferase *CREBBP* (cAMP-responsive element binding protein binding protein [MIM: 600140]).<sup>93</sup></sup>

### Conclusion

In this article, we present DNAm signatures for *CHD7* and *KMT2D* in human blood cells which hold promise for translational clinical use. These signatures, which have a high degree of sensitivity and specificity, identify specific target genes in human blood cells regulated by *CHD7* and *KMT2D*. Our findings provide evidence that *CHARGE* and Kabuki syndromes result from dysregulation of key genes involved embryonal development that are expressed in a tissue-specific manner. Future studies in developmental model systems such as human induced pluripotent stem cells will help to enhance our understanding of epigenetic regulation in diverse cell-types, including neuronal cells. The field of epigenomics offers a host of opportunities to positively impact precision medicine including a robust means of classifying pathogenicity of VUS and understanding disease pathophysiology in the context of genome-wide targets of epigenetic. The identification of a multitude of gene-specific targets across the genome provides tangible opportunities to explore novel therapeutics to reverse neurodevelopmental deficits caused by epigenetic dysregulation.

### Accession Numbers

The accession number for the DNA methylation data reported in this paper is GEO: GSE97362.

### Supplemental Data

Supplemental Information includes four figures and fourteen tables and can be found with this article online at <http://dx.doi.org/10.1016/j.ajhg.2017.04.004>.

### Acknowledgments

We would like to thank all of the patients and families for their participation in our research study, and the physicians, genetic counselors, and clinical staff for their assistance with recruitment. We would also like to thank Youliang Lou, Chunhua Zhao, and Khadine Wiltshire for their invaluable contributions to this work. Thank you as well to Dr. Greg Hanna (University of Michigan) for contributing blood DNA samples from neurotypical control individuals who had undergone cognitive/behavioral assessments. This research was funded by the Canadian Institutes of Health Research (R.W., D.T.B., M.T.S., and S.C.), the Ontario Brain Institute (R.W., D.T.B., and M.T.S.) and the Rare Diseases Foundation (R.W. and D.T.B.). This work was also supported by the Canadian Centre for Computational Genomics (C3G), part of the Genome Innovation Network (GIN), funded by Genome Canada through Genome Quebec and Ontario Genomics (M.B. and A.L.T.), and Genome Canada through Ontario Genomics (A.L.T., S.C., M.B., and R.W.).

Received: December 22, 2016

Accepted: April 6, 2017

Published: May 4, 2017

### Web Resources

GEO, <http://www.ncbi.nlm.nih.gov/geo/>

OMIM, <http://www.omim.org/>

### References

1. Vissers, L.E., van Ravenswaaij, C.M., Admiraal, R., Hurst, J.A., de Vries, B.B., Janssen, I.M., van der Vliet, W.A., Huys, E.H., de Jong, P.J., Hamel, B.C., et al. (2004). Mutations in a new member of the chromodomain gene family cause *CHARGE* syndrome. *Nat. Genet.* 36, 955–957.
2. Ng, S.B., Bigham, A.W., Buckingham, K.J., Hannibal, M.C., McMillin, M.J., Gildersleeve, H.I., Beck, A.E., Tabor, H.K., Cooper, G.M., Mefford, H.C., et al. (2010). Exome sequencing identifies *MLL2* mutations as a cause of Kabuki syndrome. *Nat. Genet.* 42, 790–793.
3. Ming, J.E., Russell, K.L., Bason, L., McDonald-McGinn, D.M., and Zackai, E.H. (2003). Coloboma and other ophthalmologic anomalies in Kabuki syndrome: distinction from charge association. *Am. J. Med. Genet. A.* 123A, 249–252.
4. Patel, N., and Alkuraya, F.S. (2015). Overlap between *CHARGE* and Kabuki syndromes: more than an interesting clinical observation? *Am. J. Med. Genet. A.* 167A, 259–260.
5. Dou, Y., Milne, T.A., Ruthenburg, A.J., Lee, S., Lee, J.W., Verdine, G.L., Allis, C.D., and Roeder, R.G. (2006). Regulation of *MLL1* H3K4 methyltransferase activity by its core components. *Nat. Struct. Mol. Biol.* 13, 713–719.
6. Zhang, P., Lee, H., Brunzelle, J.S., and Couture, J.F. (2012). The plasticity of *WDR5* peptide-binding cleft enables the binding of the *SET1* family of histone methyltransferases. *Nucleic Acids Res.* 40, 4237–4246.
7. Schulz, Y., Freese, L., Mänz, J., Zoll, B., Völter, C., Brockmann, K., Bögershausen, N., Becker, J., Wollnik, B., and Pauli, S. (2014). *CHARGE* and Kabuki syndromes: a phenotypic and molecular link. *Hum. Mol. Genet.* 23, 4396–4405.
8. Choufani, S., Cytrynbaum, C., Chung, B.H., Turinsky, A.L., Grafodatskaya, D., Chen, Y.A., Cohen, A.S., Dupuis, L.,

- Butcher, D.T., Siu, M.T., et al. (2015). NSD1 mutations generate a genome-wide DNA methylation signature. *Nat. Commun.* *6*, 10207.
9. Grafodatskaya, D., Chung, B.H., Butcher, D.T., Turinsky, A.L., Goodman, S.J., Choufani, S., Chen, Y.A., Lou, Y., Zhao, C., Rajendram, R., et al. (2013). Multilocus loss of DNA methylation in individuals with mutations in the histone H3 lysine 4 demethylase KDM5C. *BMC Med. Genomics* *6*, 1.
  10. Kernohan, K.D., Cigana Schenkel, L., Huang, L., Smith, A., Pare, G., Ainsworth, P., Boycott, K.M., Warman-Chardon, J., Sadikovic, B.; and Care4Rare Canada Consortium (2016). Identification of a methylation profile for DNMT1-associated autosomal dominant cerebellar ataxia, deafness, and narcolepsy. *Clin. Epigenetics* *8*, 91.
  11. Richards, S., Aziz, N., Bale, S., Bick, D., Das, S., Gastier-Foster, J., Grody, W.W., Hegde, M., Lyon, E., Spector, E., et al.; ACMG Laboratory Quality Assurance Committee (2015). Standards and guidelines for the interpretation of sequence variants: a joint consensus recommendation of the American College of Medical Genetics and Genomics and the Association for Molecular Pathology. *Genet. Med.* *17*, 405–424.
  12. Adzhubei, I.A., Schmidt, S., Peshkin, L., Ramensky, V.E., Gerasimova, A., Bork, P., Kondrashov, A.S., and Sunyaev, S.R. (2010). A method and server for predicting damaging missense mutations. *Nat. Methods* *7*, 248–249.
  13. Sim, N.L., Kumar, P., Hu, J., Henikoff, S., Schneider, G., and Ng, P.C. (2012). SIFT web server: predicting effects of amino acid substitutions on proteins. *Nucleic Acids Res.* *40*, W452–W457.
  14. Schwarz, J.M., Rödelberger, C., Schuelke, M., and Seelow, D. (2010). MutationTaster evaluates disease-causing potential of sequence alterations. *Nat. Methods* *7*, 575–576.
  15. Smith, P.J., Zhang, C., Wang, J., Chew, S.L., Zhang, M.Q., and Krainer, A.R. (2006). An increased specificity score matrix for the prediction of SF2/ASF-specific exonic splicing enhancers. *Hum. Mol. Genet.* *15*, 2490–2508.
  16. Cartegni, L., Wang, J., Zhu, Z., Zhang, M.Q., and Krainer, A.R. (2003). ESEfinder: A web resource to identify exonic splicing enhancers. *Nucleic Acids Res.* *31*, 3568–3571.
  17. Verloes, A. (2005). Updated diagnostic criteria for CHARGE syndrome: a proposal. *Am. J. Med. Genet. A.* *133A*, 306–308.
  18. Hale, C.L., Niederriter, A.N., Green, G.E., and Martin, D.M. (2016). Atypical phenotypes associated with pathogenic CHD7 variants and a proposal for broadening CHARGE syndrome clinical diagnostic criteria. *Am. J. Med. Genet. A.* *170A*, 344–354.
  19. Fischbach, G.D., and Lord, C. (2010). The Simons Simplex Collection: a resource for identification of autism genetic risk factors. *Neuron* *68*, 192–195.
  20. Hanna, G.L., Liu, Y., Isaacs, Y.E., Ayoub, A.M., Torres, J.J., O'Hara, N.B., and Gehring, W.J. (2016). Withdrawn/Depressed Behaviors and Error-Related Brain Activity in Youth With Obsessive-Compulsive Disorder. *J Am Acad Child Adolesc Psychiatry* *55*, 906–913 e902.
  21. Buhule, O.D., Minster, R.L., Hawley, N.L., Medvedovic, M., Sun, G., Viali, S., Deka, R., McGarvey, S.T., and Weeks, D.E. (2014). Stratified randomization controls better for batch effects in 450K methylation analysis: a cautionary tale. *Front. Genet.* *5*, 354.
  22. Chen, Y.A., Choufani, S., Grafodatskaya, D., Butcher, D.T., Ferreira, J.C., and Weksberg, R. (2012). Cross-reactive DNA microarray probes lead to false discovery of autosomal sex-associated DNA methylation. *Am. J. Hum. Genet.* *91*, 762–764.
  23. Chen, Y.A., Lemire, M., Choufani, S., Butcher, D.T., Grafodatskaya, D., Zanke, B.W., Gallinger, S., Hudson, T.J., and Weksberg, R. (2013). Discovery of cross-reactive probes and polymorphic CpGs in the Illumina Infinium HumanMethylation450 microarray. *Epigenetics* *8*, 203–209.
  24. Ritchie, M.E., Phipson, B., Wu, D., Hu, Y., Law, C.W., Shi, W., and Smyth, G.K. (2015). limma powers differential expression analyses for RNA-sequencing and microarray studies. *Nucleic Acids Res.* *43*, e47.
  25. Du, P., Zhang, X., Huang, C.C., Jafari, N., Kibbe, W.A., Hou, L., and Lin, S.M. (2010). Comparison of Beta-value and M-value methods for quantifying methylation levels by microarray analysis. *BMC Bioinformatics* *11*, 587.
  26. Reinius, L.E., Acevedo, N., Joerink, M., Pershagen, G., Dahlén, S.E., Greco, D., Söderhäll, C., Scheynius, A., and Kere, J. (2012). Differential DNA methylation in purified human blood cells: implications for cell lineage and studies on disease susceptibility. *PLoS ONE* *7*, e41361.
  27. Jaffe, A.E., Murakami, P., Lee, H., Leek, J.T., Fallin, M.D., Feinberg, A.P., and Irizarry, R.A. (2012). Bump hunting to identify differentially methylated regions in epigenetic epidemiology studies. *Int. J. Epidemiol.* *41*, 200–209.
  28. Li, D., Xie, Z., Pape, M.L., and Dye, T. (2015). An evaluation of statistical methods for DNA methylation microarray data analysis. *BMC Bioinformatics* *16*, 217.
  29. Peters, T.J., Buckley, M.J., Statham, A.L., Pidsley, R., Samaras, K., V Lord, R., Clark, S.J., and Molloy, P.L. (2015). De novo identification of differentially methylated regions in the human genome. *Epigenetics Chromatin* *8*, 6.
  30. McLean, C.Y., Bristor, D., Hiller, M., Clarke, S.L., Schaar, B.T., Lowe, C.B., Wenger, A.M., and Bejerano, G. (2010). GREAT improves functional interpretation of cis-regulatory regions. *Nat. Biotechnol.* *28*, 495–501.
  31. Consortium, T.G.O.; and Gene Ontology Consortium (2015). Gene Ontology Consortium: going forward. *Nucleic Acids Res.* *43*, D1049–D1056.
  32. Lin, J.L., Lee, W.I., Huang, J.L., Chen, P.K., Chan, K.C., Lo, L.J., You, Y.J., Shih, Y.F., Tseng, T.Y., and Wu, M.C. (2015). Immunologic assessment and KMT2D mutation detection in Kabuki syndrome. *Clin. Genet.* *88*, 255–260.
  33. Wong, M.T., Lambeck, A.J., van der Burg, M., la Bastide-van Gemert, S., Hogendorf, L.A., van Ravenswaaij-Arts, C.M., and Schölvinck, E.H. (2015). Immune Dysfunction in Children with CHARGE Syndrome: A Cross-Sectional Study. *PLoS ONE* *10*, e0142350.
  34. Banka, S., Lederer, D., Benoit, V., Jenkins, E., Howard, E., Bunstone, S., Kerr, B., McKee, S., Lloyd, I.C., Shears, D., et al. (2015). Novel KDM6A (UTX) mutations and a clinical and molecular review of the X-linked Kabuki syndrome (KS2). *Clin. Genet.* *87*, 252–258.
  35. Pruitt, K.D., Brown, G.R., Hiatt, S.M., Thibaud-Nissen, F., Astashyn, A., Ermolaeva, O., Farrell, C.M., Hart, J., Landrum, M.J., McGarvey, K.M., et al. (2014). RefSeq: an update on mammalian reference sequences. *Nucleic Acids Res.* *42*, D756–D763.
  36. Cesario, J.M., Almaidhan, A.A., and Jeong, J. (2016). Expression of forkhead box transcription factor genes Foxp1 and Foxp2 during jaw development. *Gene Expr. Patterns* *20*, 111–119.
  37. van Rhijn, J.R., and Vernes, S.C. (2015). Retinoic Acid Signaling: A New Piece in the Spoken Language Puzzle. *Front. Psychol.* *6*, 1816.

38. Kent, W.J., Sugnet, C.W., Furey, T.S., Roskin, K.M., Pringle, T.H., Zahler, A.M., and Haussler, D. (2002). The human genome browser at UCSC. *Genome Res.* 12, 996–1006.
39. Kundaje, A., Meuleman, W., Ernst, J., Bilenky, M., Yen, A., Heravi-Moussavi, A., Kheradpour, P., Zhang, Z., Wang, J., Ziller, M.J., et al.; Roadmap Epigenomics Consortium (2015). Integrative analysis of 111 reference human epigenomes. *Nature* 518, 317–330.
40. Bouazoune, K., and Kingston, R.E. (2012). Chromatin remodeling by the CHD7 protein is impaired by mutations that cause human developmental disorders. *Proc. Natl. Acad. Sci. USA* 109, 19238–19243.
41. Schnetz, M.P., Bartels, C.F., Shastri, K., Balasubramanian, D., Zentner, G.E., Balaji, R., Zhang, X., Song, L., Wang, Z., Laframboise, T., et al. (2009). Genomic distribution of CHD7 on chromatin tracks H3K4 methylation patterns. *Genome Res.* 19, 590–601.
42. Zentner, G.E., Tesar, P.J., and Scacheri, P.C. (2011). Epigenetic signatures distinguish multiple classes of enhancers with distinct cellular functions. *Genome Res.* 21, 1273–1283.
43. Martin, D.M. (2015). Epigenetic Developmental Disorders: CHARGE syndrome, a case study. *Curr. Genet. Med. Rep.* 3, 1–7.
44. Martin, D.M. (2010). Chromatin remodeling in development and disease: focus on CHD7. *PLoS Genet.* 6, e1001010.
45. Schulz, Y., Wehner, P., Opitz, L., Salinas-Riester, G., Bongers, E.M., van Ravenswaaij-Arts, C.M., Wincent, J., Schoumans, J., Kohlhase, J., Borchers, A., and Pauli, S. (2014). CHD7, the gene mutated in CHARGE syndrome, regulates genes involved in neural crest cell guidance. *Hum. Genet.* 133, 997–1009.
46. Vallianatos, C.N., and Iwase, S. (2015). Disrupted intricacy of histone H3K4 methylation in neurodevelopmental disorders. *Epigenomics* 7, 503–519.
47. Ang, S.Y., Uebersohn, A., Spencer, C.I., Huang, Y., Lee, J.E., Ge, K., and Bruneau, B.G. (2016). KMT2D regulates specific programs in heart development via histone H3 lysine 4 dimethylation. *Development* 143, 810–821.
48. Eissenberg, J.C., and Shilatifard, A. (2010). Histone H3 lysine 4 (H3K4) methylation in development and differentiation. *Dev. Biol.* 339, 240–249.
49. Bjornsson, H.T., Benjamin, J.S., Zhang, L., Weissman, J., Gerber, E.E., Chen, Y.C., Vaurio, R.G., Potter, M.C., Hansen, K.D., and Dietz, H.C. (2014). Histone deacetylase inhibition rescues structural and functional brain deficits in a mouse model of Kabuki syndrome. *Sci. Transl. Med.* 6, 256ra135.
50. Delahaye, A., Sznajder, Y., Lyonnet, S., Elmaleh-Bergès, M., Delpierre, I., Audollent, S., Wiener-Vacher, S., Mansbach, A.L., Amiel, J., Baumann, C., et al. (2007). Familial CHARGE syndrome because of CHD7 mutation: clinical intra- and interfamilial variability. *Clin. Genet.* 72, 112–121.
51. Jongmans, M.C., Hoefsloot, L.H., van der Donk, K.P., Admiraal, R.J., Magee, A., van de Laar, I., Hendriks, Y., Verheij, J.B., Walpole, I., Brunner, H.G., and van Ravenswaaij, C.M. (2008). Familial CHARGE syndrome and the CHD7 gene: a recurrent missense mutation, intrafamilial recurrence and variability. *Am. J. Med. Genet. A.* 146A, 43–50.
52. Blake, K.D., Davenport, S.L., Hall, B.D., Hefner, M.A., Pagon, R.A., Williams, M.S., Lin, A.E., and Graham, J.M., Jr. (1998). CHARGE association: an update and review for the primary pediatrician. *Clin. Pediatr. (Phila.)* 37, 159–173.
53. Blake, K.D., and Prasad, C. (2006). CHARGE syndrome. *Orphanet J. Rare Dis.* 1, 34.
54. Vihinen, M. (2014). Majority vote and other problems when using computational tools. *Hum. Mutat.* 35, 912–914.
55. Jongmans, M.C., Admiraal, R.J., van der Donk, K.P., Vissers, L.E., Baas, A.F., Kapusta, L., van Hagen, J.M., Donnai, D., de Ravel, T.J., Veltman, J.A., et al. (2006). CHARGE syndrome: the phenotypic spectrum of mutations in the CHD7 gene. *J. Med. Genet.* 43, 306–314.
56. Bergman, J.E., Janssen, N., Hoefsloot, L.H., Jongmans, M.C., Hofstra, R.M., and van Ravenswaaij-Arts, C.M. (2011). CHD7 mutations and CHARGE syndrome: the clinical implications of an expanding phenotype. *J. Med. Genet.* 48, 334–342.
57. Bergman, J.E., Janssen, N., van der Sloot, A.M., de Walle, H.E., Schoots, J., Rendtorff, N.D., Tranebjaerg, L., Hoefsloot, L.H., van Ravenswaaij-Arts, C.M., and Hofstra, R.M. (2012). A novel classification system to predict the pathogenic effects of CHD7 missense variants in CHARGE syndrome. *Hum. Mutat.* 33, 1251–1260.
58. Bögershausen, N., and Wollnik, B. (2013). Unmasking Kabuki syndrome. *Clin. Genet.* 83, 201–211.
59. Gibson, W.T., Hood, R.L., Zhan, S.H., Bulman, D.E., Fejes, A.P., Moore, R., Mungall, A.J., Eydoux, P., Babul-Hirji, R., An, J., et al.; FORGE Canada Consortium (2012). Mutations in EZH2 cause Weaver syndrome. *Am. J. Hum. Genet.* 90, 110–118.
60. Tatton-Brown, K., Hanks, S., Ruark, E., Zachariou, A., Duarte, Sdel.V., Ramsay, E., Snape, K., Murray, A., Perdeaux, E.R., Seal, S., et al.; Childhood Overgrowth Collaboration (2011). Germline mutations in the oncogene EZH2 cause Weaver syndrome and increased human height. *Oncotarget* 2, 1127–1133.
61. Geneviève, D., Amiel, J., Viot, G., Le Merrer, M., Sanlaville, D., Urtizberea, A., Gérard, M., Munnich, A., Cormier-Daire, V., and Lyonnet, S. (2004). Atypical findings in Kabuki syndrome: report of 8 patients in a series of 20 and review of the literature. *Am. J. Med. Genet. A.* 129A, 64–68.
62. Verhagen, J.M., Oostdijk, W., Terwisscha van Scheltinga, C.E., Schalij-Delfos, N.E., and van Bever, Y. (2014). An unusual presentation of Kabuki syndrome: clinical overlap with CHARGE syndrome. *Eur. J. Med. Genet.* 57, 510–512.
63. Li, D.D., Wang, Z.H., Chen, W.L., Xie, Y.Y., You, Q.D., and Guo, X.K. (2016). Structure-based design of ester compounds to inhibit MLL complex catalytic activity by targeting mixed lineage leukemia 1 (MLL1)-WDR5 interaction. *Bioorg. Med. Chem.* 24, 6109–6118.
64. Montavon, T., and Soshnikova, N. (2014). Hox gene regulation and timing in embryogenesis. *Semin. Cell Dev. Biol.* 34, 76–84.
65. Barber, B.A., and Rastegar, M. (2010). Epigenetic control of Hox genes during neurogenesis, development, and disease. *Ann. Anat.* 192, 261–274.
66. Basson, M.A. (2014). Epistatic interactions between Chd7 and Fgf8 during cerebellar development: Implications for CHARGE syndrome. *Rare Dis.* 2, e28688.
67. Micale, L., Augello, B., Maffeo, C., Selicorni, A., Zucchetti, F., Fusco, C., De Nittis, P., Pellico, M.T., Mandriani, B., Fischetto, R., et al. (2014). Molecular analysis, pathogenic mechanisms, and readthrough therapy on a large cohort of Kabuki syndrome patients. *Hum. Mutat.* 35, 841–850.
68. Mallo, M., Wellik, D.M., and Deschamps, J. (2010). Hox genes and regional patterning of the vertebrate body plan. *Dev. Biol.* 344, 7–15.
69. Hershko, A.Y., Kafri, T., Fainsod, A., and Razin, A. (2003). Methylation of HoxA5 and HoxB5 and its relevance to expression during mouse development. *Gene* 302, 65–72.

70. Parrillo, L., Costa, V., Raciti, G.A., Longo, M., Spinelli, R., Esposito, R., Nigro, C., Vastolo, V., Desiderio, A., Zatterale, F., et al. (2016). *Hoxa5* undergoes dynamic DNA methylation and transcriptional repression in the adipose tissue of mice exposed to high-fat diet. *Int. J. Obes.* *40*, 929–937.
71. Svingsen, T., and Tonissen, K.F. (2006). Hox transcription factors and their elusive mammalian gene targets. *Heredity (Edinb)* *97*, 88–96.
72. Joksimovic, M., Jeannotte, L., and Tuggle, C.K. (2005). Dynamic expression of murine HOXA5 protein in the central nervous system. *Gene Expr. Patterns* *5*, 792–800.
73. Larochelle, C., Tremblay, M., Bernier, D., Aubin, J., and Jeannotte, L. (1999). Multiple cis-acting regulatory regions are required for restricted spatio-temporal *Hoxa5* gene expression. *Dev. Dyn.* *214*, 127–140.
74. Hutlet, B., Theys, N., Coste, C., Ahn, M.T., Doshishti-Agolli, K., Lizen, B., and Gofflot, F. (2016). Systematic expression analysis of Hox genes at adulthood reveals novel patterns in the central nervous system. *Brain Struct. Funct.* *221*, 1223–1243.
75. Lizen, B., Hutlet, B., Bissen, D., Sauvegarde, D., Hermant, M., Ahn, M.T., and Gofflot, F. (2017). HOXA5 localization in postnatal and adult mouse brain is suggestive of regulatory roles in postmitotic neurons. *J. Comp. Neurol.* *525*, 1155–1175.
76. Jeannotte, L., Lemieux, M., Charron, J., Poirier, F., and Robertson, E.J. (1993). Specification of axial identity in the mouse: role of the *Hoxa-5* (*Hox1.3*) gene. *Genes Dev.* *7*, 2085–2096.
77. Lalani, S.R., Hefner, M.A., Belmont, J.W., and Davenport, S.L.H. (1993). CHARGE Syndrome. In *GeneReviews(R)*, R.A. Pagon, M.P. Adam, H.H. Ardinger, S.E. Wallace, A. Amemiya, L.J.H. Bean, T.D. Bird, N. Ledbetter, H.C. Mefford, R.J.H. Smith, et al., eds. (Seattle, WA).
78. Tsai, M.C., Manor, O., Wan, Y., Mosammamaparast, N., Wang, J.K., Lan, F., Shi, Y., Segal, E., and Chang, H.Y. (2010). Long noncoding RNA as modular scaffold of histone modification complexes. *Science* *329*, 689–693.
79. Wang, X.Q., and Dostie, J. (2016). Reciprocal regulation of chromatin state and architecture by HOTAIRM1 contributes to temporal collinear HOXA gene activation. *Nucleic Acids Res.* Published online October 26, 2016. <http://dx.doi.org/10.1093/nar/gkw966>.
80. Long, K., Moss, L., Laursen, L., Boulter, L., and French-Constant, C. (2016). Integrin signalling regulates the expansion of neuroepithelial progenitors and neurogenesis via Wnt7a and Decorin. *Nat. Commun.* *7*, 10354.
81. Loulier, K., Lathia, J.D., Marthiens, V., Relucio, J., Mughal, M.R., Tang, S.C., Coksaygan, T., Hall, P.E., Chigurupati, S., Patton, B., et al. (2009). beta1 integrin maintains integrity of the embryonic neocortical stem cell niche. *PLoS Biol.* *7*, e1000176.
82. Takahashi, H., Katayama, K., Sohya, K., Miyamoto, H., Prasad, T., Matsumoto, Y., Ota, M., Yasuda, H., Tsumoto, T., Aruga, J., et al. (2012). Selective control of inhibitory synapse development by Slitrk3-PTPdelta trans-synaptic interaction. *Nat Neurosci* *15*, 389–398, S381–382.
83. Aruga, J., and Mikoshiba, K. (2003). Identification and characterization of Slitrk, a novel neuronal transmembrane protein family controlling neurite outgrowth. *Mol. Cell. Neurosci.* *24*, 117–129.
84. Song, M., Giza, J., Proenca, C.C., Jing, D., Elliott, M., Dincheva, I., Shmelkov, S.V., Kim, J., Schreiner, R., Huang, S.H., et al. (2015). Slitrk5 Mediates BDNF-Dependent TrkB Receptor Trafficking and Signaling. *Dev. Cell* *33*, 690–702.
85. Shmelkov, S.V., Hormigo, A., Jing, D., Proenca, C.C., Bath, K.G., Milde, T., Shmelkov, E., Kushner, J.S., Baljevic, M., Dincheva, I., et al. (2010). Slitrk5 deficiency impairs corticostriatal circuitry and leads to obsessive-compulsive-like behaviors in mice. *Nat Med* *16*, 598–602.
86. Vargha-Khadem, F., Gadian, D.G., Copp, A., and Mishkin, M. (1993). FOXP2 and the neuroanatomy of speech and language. *Nat Rev Neurosci* *6*, 131–138.
87. Zadro, C., Alemanno, M.S., Bellacchio, E., Ficarella, R., Donaudy, F., Melchionda, S., Zelante, L., Rabionet, R., Hilgert, N., Estivill, X., et al. (2009). Are MYO1C and MYO1F associated with hearing loss? *Biochim. Biophys. Acta* *1792*, 27–32.
88. Lee, M.G., Villa, R., Trojer, P., Norman, J., Yan, K.P., Reinberg, D., Di Croce, L., and Shiekhattar, R. (2007). Demethylation of H3K27 regulates polycomb recruitment and H2A ubiquitination. *Science* *318*, 447–450.
89. Issaeva, I., Zonis, Y., Rozovskaia, T., Orlovsky, K., Croce, C.M., Nakamura, T., Mazo, A., Eisenbach, L., and Canaani, E. (2007). Knockdown of ALR (MLL2) reveals ALR target genes and leads to alterations in cell adhesion and growth. *Mol. Cell. Biol.* *27*, 1889–1903.
90. Kim, J.H., Sharma, A., Dhar, S.S., Lee, S.H., Gu, B., Chan, C.H., Lin, H.K., and Lee, M.G. (2014). UTX and MLL4 coordinately regulate transcriptional programs for cell proliferation and invasiveness in breast cancer cells. *Cancer Res.* *74*, 1705–1717.
91. Van Laarhoven, P.M., Neitzel, L.R., Quintana, A.M., Geiger, E.A., Zackai, E.H., Clouthier, D.E., Artinger, K.B., Ming, J.E., and Shaikh, T.H. (2015). Kabuki syndrome genes KMT2D and KDM6A: functional analyses demonstrate critical roles in craniofacial, heart and brain development. *Hum. Mol. Genet.* *24*, 4443–4453.
92. Guy, J., Gan, J., Selfridge, J., Cobb, S., and Bird, A. (2007). Reversal of neurological defects in a mouse model of Rett syndrome. *Science* *315*, 1143–1147.
93. Alarcón, J.M., Malleret, G., Touzani, K., Vronskaya, S., Ishii, S., Kandel, E.R., and Barco, A. (2004). Chromatin acetylation, memory, and LTP are impaired in CBP<sup>+/-</sup> mice: a model for the cognitive deficit in Rubinstein-Taybi syndrome and its amelioration. *Neuron* *42*, 947–959.



**Supplemental Data**

**CHARGE and Kabuki Syndromes: Gene-Specific DNA Methylation Signatures Identify Epigenetic Mechanisms Linking These Clinically Overlapping Conditions**

**Darci T. Butcher, Cheryl Cytrynbaum, Andrei L. Turinsky, Michelle T. Siu, Michal Inbar-Feigenberg, Roberto Mendoza-Londono, David Chitayat, Susan Walker, Jerry Machado, Oana Caluseriu, Lucie Dupuis, Daria Grafodatskaya, William Reardon, Brigitte Gilbert-Dussardier, Alain Verloes, Frederic Bilan, Jeff M. Milunsky, Raveen Basran, Blake Papsin, Tracy L. Stockley, Stephen W. Scherer, Sanaa Choufani, Michael Brudno, and Rosanna Weksberg**

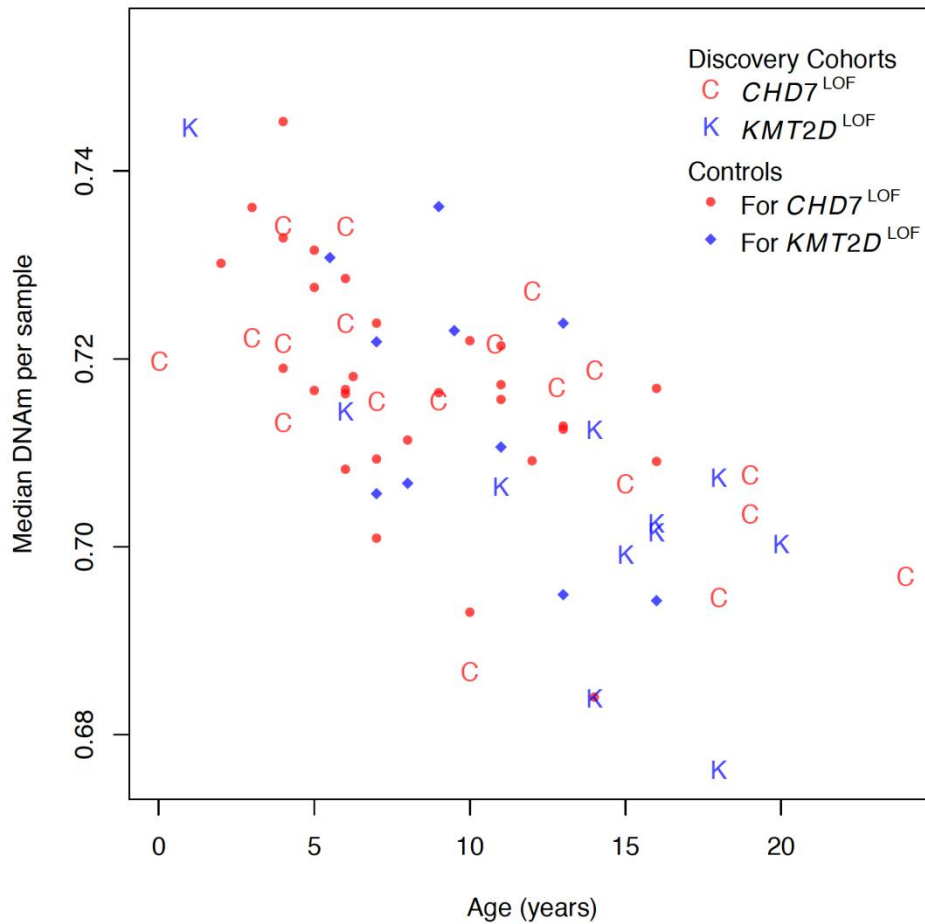

**Figure S1. Age distribution of the  $CHD7^{LOF}$  and  $KMT2D^{LOF}$  samples in the Discovery cohorts.** The age in years of the  $CHD7^{LOF}$  (red C),  $CHD7^{LOF}$  matching controls, (red circles),  $KMT2D^{LOF}$  (blue K) and  $KMT2D^{LOF}$  matching controls (blue diamonds) are plotted (X-axis) against the median DNAm per sample (Y-axis).

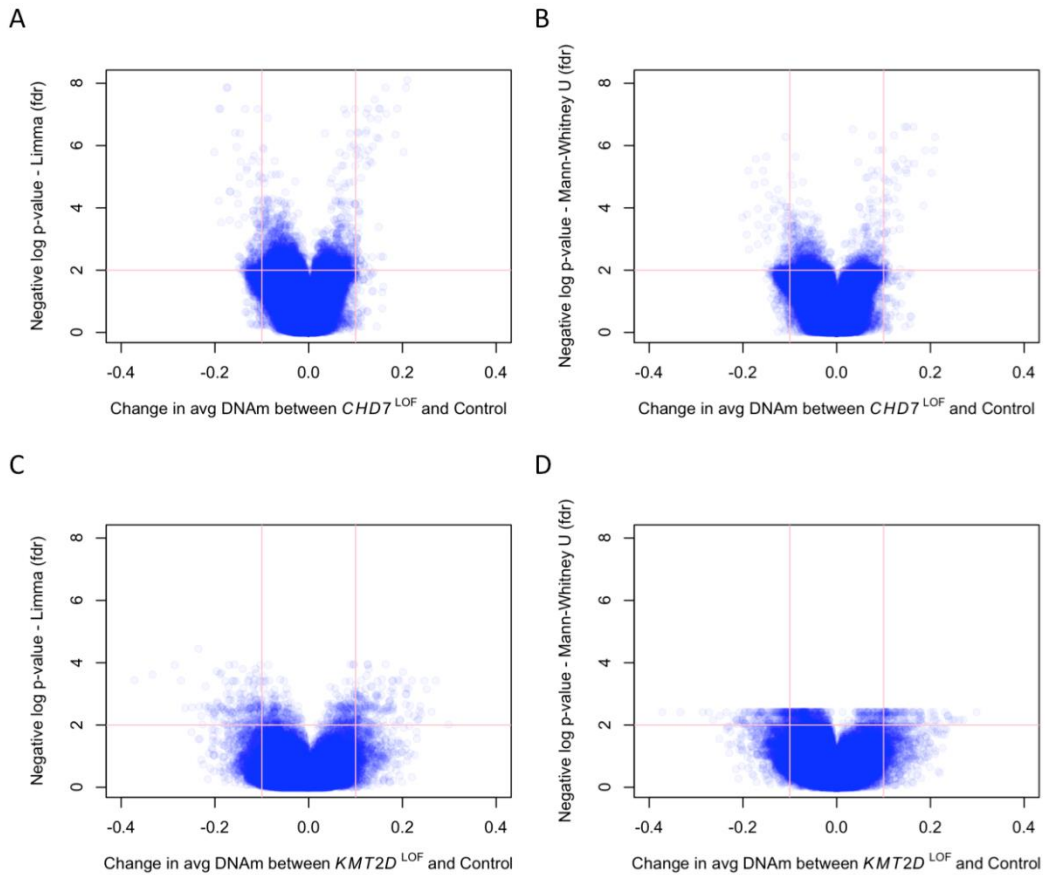

**Figure S2. Volcano plots shows the average gain/loss of DNAm using limma regression and Mann-Whitney U tests.** Average gain/loss of DNAm (X-axis) at all CpG sites are plotted against the statistical significance of such change after FDR correction for multiple testing (Y-axis, log-scale). Individual CpGs are indicated as semi-transparent circles. A) Average DNAm change in 19 *CHD7*<sup>LOF</sup> samples with respect to 29 matching controls, with the statistical significance derived from *limma* regression test. B) Average DNAm change in 19 *CHD7*<sup>LOF</sup> samples with respect to 29 matching controls, with the statistical significance derived from non-parametric Mann-Whitney U test. C) Average DNAm change in 11 *KMT2D*<sup>LOF</sup> samples with respect to 11 matching controls, with the statistical significance derived from *limma* regression test. D) Average DNAm change in 11 *KMT2D*<sup>LOF</sup> samples with respect to 11 matching controls, with the statistical significance derived from non-parametric Mann-Whitney U test. The FDR-adjusted significance level  $\alpha=0.01$  is shown as pink horizontal lines. The effect-size threshold of 10% DNAm difference is shown as pink vertical lines. Relatively few CpG sites have DNAm change over 10% by magnitude while also exhibiting the statistical significance level  $\alpha=0.01$ .

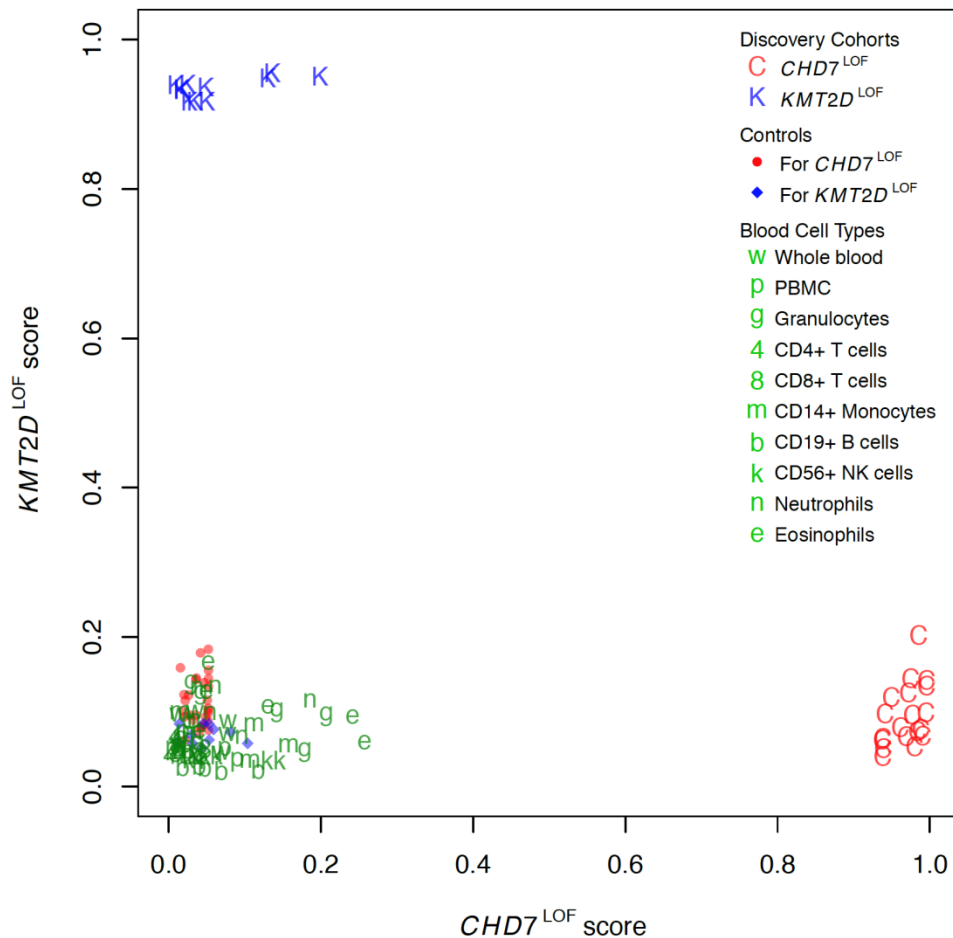

**Figure S3. Independence of blood cell type composition from the  $CHD7^{LOF}$  and  $KMT2D^{LOF}$  DNAm signatures.** We extracted DNAm data from Reinius *et al.*, 2012 (GEO: GSE35069) representing 6 samples from each of the following cell types: whole blood, peripheral blood mononuclear cells (PBMC), granulocytes, neutrophils, eosinophils, as well as isolated cell populations (CD4+ T cells, CD8+ T cells, CD56+ NK cells, CD19+ B cells, CD14+ monocytes). All cell-type samples received low scores from the two predictive models built for  $CHD7^{LOF}$  and  $KMT2D^{LOF}$  DNAm signatures (X-axis and Y-axis, respectively; compare to Figure 2 in the main text), demonstrating that the predictions are not biased by any of the cell types, and are therefore robust to cell-subtype composition.

A

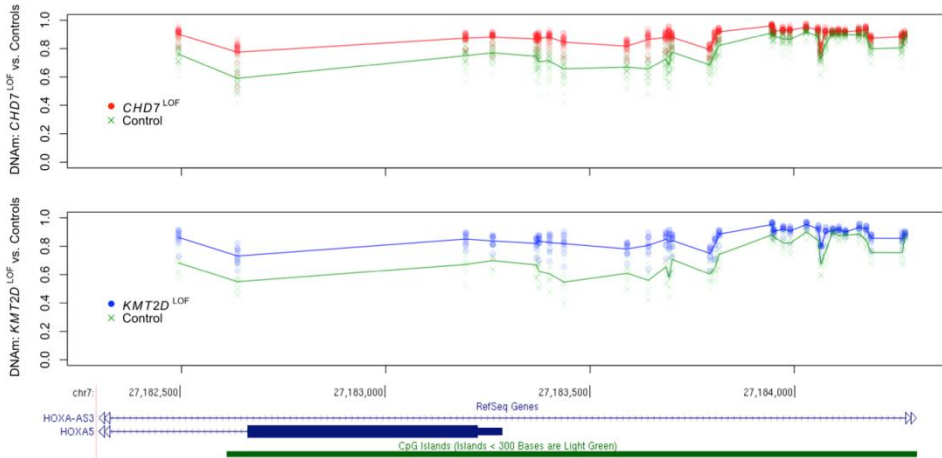

B

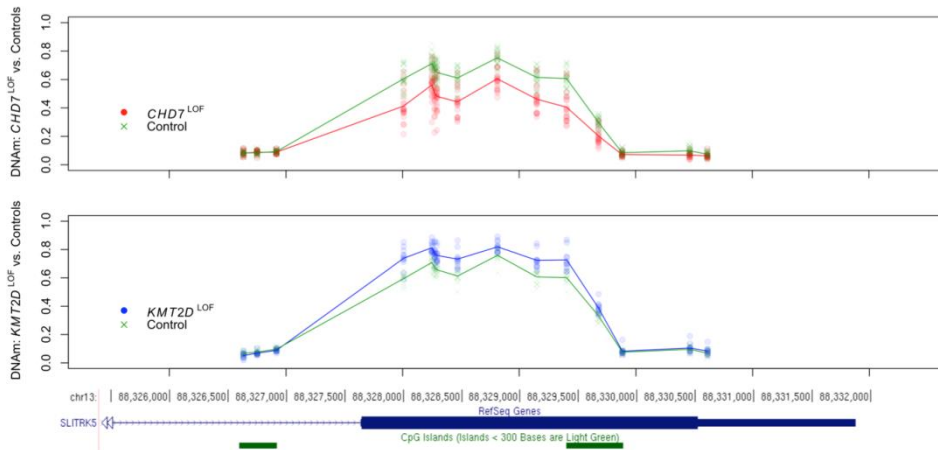

**Figure S4. Overlap in differentially methylated regions (DMR) associated with the *CHD7*<sup>LOF</sup> and *KMT2D*<sup>LOF</sup> mutations.** A) The DMR near the promoter of *HOXA5* shows a gain of methylation in both *CHD7*<sup>LOF</sup> and *KMT2D*<sup>LOF</sup> Discovery Cohorts. DNAm values are visualized as semi-transparent circles or crosses, arranged vertically for each CpG in the region spanning the candidate gene promoter. The X-axis shows the position of CpG site along the chromosome. The top panel shows the methylation level (Y-axis) for individual CpGs in each *CHD7*<sup>LOF</sup> individual (red circles) and each matching control sample (green crosses). Also shown are group-average DNAm levels for the *CHD7*<sup>LOF</sup> cohort (red line) and controls (green line). Similarly, the bottom panel shows the DNAm level (Y-axis) for individual CpGs in each *KMT2D*<sup>LOF</sup> individual (blue circles) and each matching controls (green crosses). Also shown are the corresponding group averages (blue and green lines, respectively). The DMRs correspond to the gap between the lines showing the group-average DNAm levels. B) The DMR near the promoter of *SLITRK5* shows a loss of DNAm in *CHD7*<sup>LOF</sup> but a gain of DNAm in *KMT2D*<sup>LOF</sup> individuals.

**Table S1.** Molecular data for *CHD7*<sup>LOF</sup> and *CHD7* sequence variants.

a) *CHD7* Loss of Function Mutations (*CHD7*<sup>LOF</sup>) Analyzed to Derive the DNAm Signature

| <u>Sample ID</u> | <u>mutation DNA</u> | <u>mutation protein</u> | <u>coding effect/splice site mutation</u> |
|------------------|---------------------|-------------------------|-------------------------------------------|
| CHD7-1           | c.7282C>T           | p.Arg2428*              | nonsense                                  |
| CHD7-2           | c.3526C>T           | p.Gln1176*              | nonsense                                  |
| CHD7-3           | c.934C>T            | p.Arg312*               | nonsense                                  |
| CHD7-4           | c.562C>T            | p.Gly188*               | nonsense                                  |
| CHD7-5           | c.1327delATGGG      | p.Met443Asnfs*130       | frameshift                                |
| CHD7-6           | c.2504_2508delATCTT | p.Tyr835Serfs*14        | frameshift                                |
| CHD7-7           | c.1990G>T           | p.Glu664*               | nonsense                                  |
| CHD7-8           | c.3377dupT          | p.Leu1126Phefs*46       | frameshift                                |
| CHD7-9           | c.2585delA          | p.Leu862Serfs*26        | frameshift                                |
| CHD7-10          | c.2905_2906del      | p.Arg969Glyfs*25        | frameshift                                |
| CHD7-11          | c.7636G>T           | p.Glu2546*              | nonsense                                  |
| CHD7-12          | c.361delC           | p.Gly121Valfs*90        | frameshift                                |
| CHD7-13          | c.2504_2508delATCTT | p.Arg835Serfs*14        | frameshift                                |
| CHD7-14          | c.7717-7720del      | p.Gln2537*              | nonsense                                  |
| CHD7-15          | c.5458C>T           | p.Arg1820*              | nonsense                                  |
| CHD7-16          | exon 1 deletion     | ND                      | exon 1 deletion                           |
| CHD7-17          | c.5405-17G>A        | ND                      | splice site mutation                      |
| CHD7-18          | c.5405-7G>A         | ND                      | splice site mutation                      |
| CHD7-19          | c.2097-1G>A         | ND                      | splice site mutation                      |

b) *CHD7* Sequence Variants Classified Using the *CHD7*<sup>LOF</sup> DNAm Signature

| <u>Sample ID</u> | <u>mutation DNA</u>  | <u>mutation protein</u> | <u>coding effect/splice site mutation</u> |
|------------------|----------------------|-------------------------|-------------------------------------------|
| CHD7-20          | c.6322G>T            | p.Gly2108Trp            | missense                                  |
| CHD7-21          | c.3746G>A            | p.Arg1249Gln            | missense                                  |
| CHD7-22          | c.2751G>A            | p.= (p.Thr917Thr)       | synonymous                                |
| CHD7-23          | c.-15G>A             | ND                      | splice site mutation                      |
| CHD7-24          | c.4225G>A            | p.Val1409Met            | missense                                  |
| CHD7-25          | c.5436C>G            | p.Asp1812Glu            | missense                                  |
| CHD7-26          | c.5633A>G            | p.Asp1878Gly            | missense                                  |
| CHD7-27          | c.5848G>A            | p.Ala1950Thr            | missense                                  |
| CHD7-28          | c.6304G>T            | p.Val2102Phe            | missense                                  |
| CHD7-29          | c.3566G>A            | p.Arg1189His            | missense                                  |
| CHD7-30          | intron4:c2238+1del   | ND                      | splice site mutation                      |
| CHD7-31          | c.2049_2050insAAAGCA | p.Ala685_Lys686dup      | missense                                  |
| CHD7-32          | c.6377A>T            | p.Asp2126Val            | missense                                  |

Abbreviations

ND not determined

**Table S2.** Molecular data for *KMT2D*<sup>LOF</sup> and *KMT2D* sequence variants.

a) *KMT2D* Loss of Function Mutations (*KMT2D*<sup>LOF</sup>) Analyzed to Derive the DNAm Signature

| <u>Sample ID</u> | <u>mutation DNA</u> | <u>mutation protein</u> | <u>Coding Effect</u> |
|------------------|---------------------|-------------------------|----------------------|
| KMT2D-1          | c.15061C>T          | p.Arg5021*              | nonsense             |
| KMT2D-2          | c.16318delG         | p.Glu5440Argfs*16       | frameshift           |
| KMT2D-3          | c15030dupA          | p.Glu5011Argfs*13       | frameshift           |
| KMT2D-4          | c.8172_8173delC     | p.Phe2724Glnfs*5        | frameshift           |
| KMT2D-5          | c.6595delT          | p.Tyr2199Ilefs*65       | frameshift           |
| KMT2D-6          | c.14055-14056delCA  | p.His4685Glnfs*4        | frameshift           |
| KMT2D-7          | c.6295C>T           | p.Arg2099*              | nonsense             |
| KMT2D-8          | c.4135_4136delA     | p.Met1379Valfs*52       | frameshift           |
| KMT2D-9          | c.12592C>T          | p.Arg4198*              | nonsense             |
| KMT2D-10         | c.4135_4136delA     | p.Met1379Valfs*52       | frameshift           |
| KMT2D-11         | c.11710C>T          | p.Gln3904*              | nonsense             |

b) *KMT2D* Sequence Variants Classified Using the *KMT2D*<sup>LOF</sup> DNAm Signature

| <u>Sample ID</u> | <u>mutation DNA</u>    | <u>mutation protein</u> | <u>Coding Effect/Splice Site Mutation</u> |
|------------------|------------------------|-------------------------|-------------------------------------------|
| KMT2D-12         | c.15143G>A             | p.Arg5048His            | missense                                  |
| KMT2D-13         | c.12028T>C             | p.Ser4010Pro            | missense                                  |
| KMT2D-14         | c.16522-5_16522-4delTT | ND                      | splice site mutation                      |
| KMT2D-15         | c.15910A>G             | p.Ile5304Val            | missense                                  |
| KMT2D-16         | c.15659G>A             | p.Arg5220His            | missense                                  |
| KMT2D-17         | c.10256A>G             | p.Asp3419Gly            | missense                                  |
| KMT2D-18         | c.8974G>A              | p.Glu2992Lys            | missense                                  |
| KMT2D-19         | c.8831A>G              | p.Asn2944Ser            | missense                                  |
| KMT2D-20         | c.832G>A               | p.Ala278Thr             | missense                                  |
| KMT2D-21         | c.682C>G               | p.Arg228Gly             | missense                                  |

Abbreviations

ND not determined

**Table S5.** Validation cohort and classification utilizing *CHD7*<sup>LOF</sup> and *KMT2D*<sup>LOF</sup> signatures.

a) Validation Samples with *CHD7* Mutations Classified Using the *CHD7*<sup>LOF</sup> DNAm Signature

| SampleID | Signature (positive/negative) | Gene        | Mutation          | Protein Change           | Coding Effect/Splice Site Mutation |
|----------|-------------------------------|-------------|-------------------|--------------------------|------------------------------------|
| CHD7-33  | negative                      | <i>CHD7</i> | c.4851T>G         | p.=(p.Gly1617Gly)        | synonymous                         |
| CHD7-34  | positive                      | <i>CHD7</i> | c.5097dupA        | p.Ala1700Serfs*37        | frameshift                         |
| CHD7-35  | positive                      | <i>CHD7</i> | c.8791 G>A        | p.Val2931Met             | missense                           |
| CHD7-36  | positive                      | <i>CHD7</i> | c.799G>T          | p.Glu267*                | nonsense                           |
| CHD7-37  | negative                      | <i>CHD7</i> | c.8802C>G         | p.Ser2934Arg             | missense                           |
| CHD7-38  | positive                      | <i>CHD7</i> | c.2516_2518delAGT | p.Gln839_Trp840delinsArg | in-frame deletion                  |
| CHD7-39  | negative                      | <i>CHD7</i> | c.8759G>C         | p.Gly2920Ala             | missense                           |
| CHD7-40  | positive                      | <i>CHD7</i> | c.1312C>T         | p.Gln438*                | nonsense                           |
| CHD7-41  | positive                      | <i>CHD7</i> | c.6322G>A         | p.Gly2108Arg             | missense                           |
| CHD7-42  | positive                      | <i>CHD7</i> | c.127A>G          | p.Ile43Val               | missense                           |
| CHD7-43  | negative                      | <i>CHD7</i> | c.1405A>G         | p.Arg469Gly              | missense                           |
| CHD7-44  | positive                      | <i>CHD7</i> | c.7763A>G         | p.Asn2588Ser             | missense                           |
| CHD7-45  | positive                      | <i>CHD7</i> | c.3871A>C         | p.Lys1291Gln             | missense                           |
| CHD7-46  | positive                      | <i>CHD7</i> | c.5050G>A         | p.Gly1684Ser             | missense                           |
| CHD7-47  | positive                      | <i>CHD7</i> | c.5210+3A>G       | ND                       | splice site mutation               |
| CHD7-48  | positive                      | <i>CHD7</i> | c.6193C>T         | p.Arg2065Cys             | missense                           |
| CHD7-49  | positive                      | <i>CHD7</i> | c.3762T>A         | p.His1254Gln             | missense                           |
| CHD7-50  | negative                      | <i>CHD7</i> | c.583C>T          | p.Arg195Cys              | missense                           |
| CHD7-51  | positive                      | <i>CHD7</i> | c.4087delC        | p.Leu1363Serfs*9         | frameshift                         |
| CHD7-52  | positive                      | <i>CHD7</i> | c.2498+1G>T       | ND                       | splice site mutation               |
| CHD7-53  | positive                      | <i>CHD7</i> | c.1918delG        | p.Gly640Lysfs*71         | frameshift                         |
| CHD7-54  | negative                      | <i>CHD7</i> | c.1562C>T         | p.Pro521Leu              | missense                           |
| CHD7-55  | positive                      | <i>CHD7</i> | c.604 C>T         | p.Gln202*                | nonsense                           |
| CHD7-56  | positive                      | <i>CHD7</i> | c.4393C>T         | p.Arg1465*               | nonsense                           |
| CHD7-57  | positive                      | <i>CHD7</i> | c.5666-9C>G       | ND                       | splice site mutation               |
| CHD7-58  | positive                      | <i>CHD7</i> | c.5029C>T         | p.Arg1677*               | nonsense                           |
| CHD7-59  | negative                      | <i>CHD7</i> | c.1797_1799delGAA | p.Lys602del              | in-frame deletion                  |
| CHD7-60  | positive                      | <i>CHD7</i> | c.3177T>G         | p.Tyr1059*               | nonsense                           |
| CHD7-61  | positive                      | <i>CHD7</i> | c.2839C>T         | p.Arg947*                | nonsense                           |
| CHD7-62  | positive                      | <i>CHD7</i> | c.5429G>C         | p.Arg1810Pro             | missense                           |
| CHD7-63  | positive                      | <i>CHD7</i> | c.4361_4362delAG  | p.Gln1454Profs*21        | frameshift                         |
| CHD7-64  | positive                      | <i>CHD7</i> | c.2362C>T         | p.Gln788*                | nonsense                           |
| CHD7-65  | negative                      | <i>CHD7</i> | c.5827C>T         | p.Arg1943Trp             | missense                           |
| CHD7-66  | negative                      | <i>CHD7</i> | c.317A>G          | p.His106Arg              | missense                           |
| CHD7-67  | negative                      | <i>CHD7</i> | c.6529G>A         | p.Gln2177Lys             | missense                           |
| CHD7-68  | positive                      | <i>CHD7</i> | c.8507delC        | p.Pro2836Argfs*53        | frameshift                         |
| CHD7-69  | positive                      | <i>CHD7</i> | c.3655C>T         | p.Arg1219*               | nonsense                           |
| CHD7-70  | positive                      | <i>CHD7</i> | c.6356A>G         | p.Asp2119Gly             | missense                           |
| CHD7-71  | positive                      | <i>CHD7</i> | c.1141_1142delAT  | p.Met381Alafs*23         | frameshift                         |
| CHD7-72  | positive                      | <i>CHD7</i> | c.3082A>G         | p.Ile1028Val             | missense                           |

b) Validation Samples with *KMT2D* or *KDM6A* Mutations Classified Using the *KMT2D*<sup>LOF</sup> DNAm Signature

| SampleID | Signature (positive/negative) | Gene         | Mutation            | Protein Change    | Coding Effect/Splice Site Mutation |
|----------|-------------------------------|--------------|---------------------|-------------------|------------------------------------|
| KDM6A-1  | positive                      | <i>KDM6A</i> | c.2668_2669dupTA    | p.Pro891Thrfs*8   | frameshift                         |
| KMT2D-22 | positive                      | <i>KMT2D</i> | c.11158C>T          | p.Gln3720*        | nonsense                           |
| KMT2D-23 | negative                      | <i>KMT2D</i> | c.15587T>A          | p.Met5196Lys      | missense                           |
| KMT2D-24 | negative                      | <i>KMT2D</i> | c.11150A>C          | p.Gln3717Pro      | missense                           |
| KMT2D-25 | positive                      | <i>KMT2D</i> | c.16521+1G>T        | ND                | splice site mutation               |
| KMT2D-26 | positive                      | <i>KMT2D</i> | c.1940dupC          | p.Pro648Thrfs*2   | frameshift                         |
| KMT2D-27 | negative                      | <i>KMT2D</i> | c.11578_11580dupCAG | p.Gln3863dup      | in-frame duplication               |
| KMT2D-28 | negative                      | <i>KMT2D</i> | c.10909C>A          | p.Pro3637Thr      | missense                           |
| KMT2D-29 | positive                      | <i>KMT2D</i> | c.15088C>T          | p.Arg5030Cys      | missense                           |
| KMT2D-30 | positive                      | <i>KMT2D</i> | c.5135delA          | p.Lys1712Argfs*10 | frameshift                         |
| KMT2D-31 | negative                      | <i>KMT2D</i> | c.12662_12664dupAGC | p.Gln4221dup      | in-frame duplication               |
| KMT2D-32 | positive                      | <i>KMT2D</i> | c.16052G>A          | p.Arg5351Gln      | missense                           |
| KMT2D-33 | positive                      | <i>KMT2D</i> | c.11203C>T          | p.Gln3735*        | nonsense                           |
| KMT2D-34 | negative                      | <i>KMT2D</i> | c.2334C>G           | p.Cys778Trp       | missense                           |
| KMT2D-35 | negative                      | <i>KMT2D</i> | c.14731_14733delCCT | p.Pro4911del      | in-frame deletion                  |
| KMT2D-36 | positive                      | <i>KMT2D</i> | c.15536G>A          | p.Arg5179His      | missense                           |
| KMT2D-37 | positive                      | <i>KMT2D</i> | c.15626G>T          | p.Gly5209Val      | missense                           |

Abbreviations

|     |                                  |
|-----|----------------------------------|
| n/a | not applicable                   |
| ND  | not determined                   |
| VUS | Variants of unknown significance |



| Variant Designation | Align GVGD | SIFT (score)       | Mutation Taster (p-value) | PolyPhen-2 (score)        | ESEfinder Splicing Predictions |
|---------------------|------------|--------------------|---------------------------|---------------------------|--------------------------------|
| VUS                 | n/a        | n/a                | n/a                       | n/a                       | n/a                            |
| Pathogenic          | n/a        | n/a                | n/a                       | n/a                       | n/a                            |
| VUS                 | Class C0   | Tolerated (0.21)   | Disease Causing (0.998)   | probably damaging (0.998) | n/a                            |
| Pathogenic          | n/a        | n/a                | n/a                       | n/a                       | n/a                            |
| VUS                 | Class C0   | Tolerated (0.15)   | polymorphism (0.998)      | benign (0.001)            | n/a                            |
| VUS                 | n/a        | n/a                | n/a                       | n/a                       | n/a                            |
| VUS                 | Class C0   | Deleterious (0)    | Disease Causing (1)       | probably damaging (0.999) | n/a                            |
| Pathogenic          | n/a        | n/a                | n/a                       | n/a                       | n/a                            |
| Pathogenic          | Class C65  | Deleterious (0)    | Disease Causing (1)       | probably damaging (1)     | n/a                            |
| VUS                 | Class C0   | Tolerated (0.23)   | Polymorphism (0.998)      | benign (0.001)            | n/a                            |
| VUS                 | Class C0   | Tolerated (0.09)   | Disease Causing (0.99)    | probably damaging (0.963) | n/a                            |
| VUS                 | Class C0   | Tolerated (0.72)   | Disease Causing (0.999)   | benign (0.032)            | n/a                            |
| VUS                 | Class C45  | Deleterious (0)    | Disease Causing (1)       | probably damaging (1)     | n/a                            |
| Pathogenic          | ClassC55   | Deleterious (0)    | Disease Causing (1)       | probably damaging (0.990) | n/a                            |
| Pathogenic          | n/a        | n/a                | n/a                       | n/a                       | no ESE prediction disruption   |
| VUS                 | Class C45  | Deleterious (0)    | Disease Causing (1)       | probably damaging (1)     | n/a                            |
| VUS                 | Class C15  | Deleterious (0)    | Disease Causing (1)       | probably damaging (0.988) | n/a                            |
| VUS                 | Class C15  | Deleterious (0.03) | Disease Causing (1)       | probably damaging (0.997) | n/a                            |
| Pathogenic          | n/a        | n/a                | n/a                       | n/a                       | n/a                            |
| Pathogenic          | n/a        | n/a                | n/a                       | n/a                       | unclear prediction             |
| Pathogenic          | n/a        | n/a                | n/a                       | n/a                       | n/a                            |
| VUS                 | Class C0   | Tolerated (0.36)   | Disease Causing (1)       | benign (0.072)            | n/a                            |
| Pathogenic          | n/a        | n/a                | n/a                       | n/a                       | n/a                            |
| Pathogenic          | n/a        | n/a                | n/a                       | n/a                       | n/a                            |
| VUS                 | n/a        | n/a                | n/a                       | n/a                       | disrupts SRp40 site            |
| Pathogenic          | n/a        | n/a                | n/a                       | n/a                       | n/a                            |
| VUS                 | n/a        | n/a                | n/a                       | n/a                       | n/a                            |
| Pathogenic          | n/a        | n/a                | n/a                       | n/a                       | n/a                            |
| Pathogenic          | n/a        | n/a                | n/a                       | n/a                       | n/a                            |
| VUS                 | Class C65  | Deleterious (0)    | Disease Causing (1)       | probably damaging (1)     | n/a                            |
| Likely Pathogenic   | n/a        | n/a                | n/a                       | n/a                       | n/a                            |
| Pathogenic          | n/a        | n/a                | n/a                       | n/a                       | n/a                            |
| VUS                 | Class C0   | Deleterious (0)    | Disease Causing (1)       | probably damaging (0.998) | n/a                            |
| VUS                 | Class C0   | Tolerated (0.19)   | Disease Causing (1)       | possibly damaging (0.634) | n/a                            |
| VUS                 | Class C0   | Tolerated (0.9)    | Disease Causing (0.963)   | benign (0.006)            | n/a                            |
| Likely Pathogenic   | n/a        | n/a                | n/a                       | n/a                       | n/a                            |
| Pathogenic          | n/a        | n/a                | n/a                       | n/a                       | n/a                            |
| VUS                 | Class C0   | Tolerated (0.06)   | Disease Causing (1)       | probably damaging (1)     | n/a                            |
| Likely Pathogenic   | n/a        | n/a                | n/a                       | n/a                       | n/a                            |
| Pathogenic          | Class C25  | Deleterious (0)    | Disease Causing (1)       | possibly damaging (0.752) | n/a                            |

| Variant Designation | Align GVGD | SIFT (score)       | Mutation Taster(p-value) | PolyPhen-2 (score)        | ESEfinder Splicing Predictions |
|---------------------|------------|--------------------|--------------------------|---------------------------|--------------------------------|
| Pathogenic          | n/a        | n/a                | n/a                      | n/a                       | n/a                            |
| Likely Pathogenic   | n/a        | n/a                | n/a                      | n/a                       | n/a                            |
| VUS                 | Class C0   | Deleterious (0.01) | Disease Causing (1)      | probably damaging (0.986) | n/a                            |
| VUS                 | Class C0   | Tolerated (0.22)   | Disease Causing (1)      | probably damaging (0.999) | n/a                            |
| Likely Pathogenic   | n/a        | n/a                | n/a                      | n/a                       | disrupts a SF2/ASFsite         |
| Likely Pathogenic   | n/a        | n/a                | n/a                      | n/a                       | n/a                            |
| VUS                 | n/a        | n/a                | n/a                      | n/a                       | n/a                            |
| VUS                 | Class C0   | Tolerated (0.18)   | polymorphism (0.506)     | possibly damaging (0.900) | n/a                            |
| Pathogenic          | Class C0   | Deleterious (0)    | Disease Causing (1)      | possibly damaging (1)     | n/a                            |
| Likely Pathogenic   | n/a        | n/a                | n/a                      | n/a                       | n/a                            |
| VUS                 | n/a        | n/a                | n/a                      | n/a                       | n/a                            |
| Pathogenic          | Class C0   | Deleterious (0.02) | Disease Causing (1)      | probably damaging (1)     | n/a                            |
| Likely Pathogenic   | n/a        | n/a                | n/a                      | n/a                       | n/a                            |
| VUS                 | Class C0   | Tolerated (0.08)   | polymorphism (1)         | possibly damaging (0.758) | n/a                            |
| VUS                 | n/a        | n/a                | n/a                      | n/a                       | n/a                            |
| Pathogenic          | Class C0   | Deleterious (0)    | disease causing (1)      | possible damaging (0.840) | n/a                            |
| VUS                 | Class C0   | Deleterious (0)    | Disease Causing (1)      | probably damaging (1)     | n/a                            |

**Table S14.** Sequences of primers used for sodium bisulfite pyrosequencing validation.

|                       |                                | PCR product size |
|-----------------------|--------------------------------|------------------|
| <u><i>SLITRK5</i></u> |                                | 170bp            |
| SLITRK5F              | TGGGAAATTGTATTTGTTGTAGGTGT     |                  |
| SLITRK5R              | ACTCCACAACCTTATCCATATACTAC     |                  |
| SLITRK5S              | ACTACAAAAACCCAC                |                  |
| <u><i>MYOF1</i></u>   |                                | 183bp            |
| MYOF1F                | GATTTATTGGAGTTTTTGGGTAGT       |                  |
| MYOF1R                | CCCCAAACTTTCTTCTCT             |                  |
| MYOF1S                | GAAGTAGAGGGAGAAGGT             |                  |
| <u><i>FOXP2</i></u>   |                                | 248bp            |
| FOXP2F                | AGAAAGATTATGGTAAGTATGTTGGTTTAG |                  |
| FOXP2R                | CCACCATCAAACAACCTTTACAACAA     |                  |
| FOXP2S                | TGATTAAATGTTGATTTTGTGTA        |                  |
| <u><i>HOXA5</i></u>   |                                | 160bp            |
| HOXA5-F4              | TGAATTATGGAAATGATTGGGATATGTAT  |                  |
| HOXA5-R4              | TCCACCCAACCTCCCCTATTA          |                  |
| HOXA5-S4              | AGGTATTTAAATATGGGGT            |                  |
